# Supplementary material
Source: PubMed Central journal article supplement (PMC5853934)

## Supplementary data S5- Moran's I statistics and associated p-values for villages by survey month (M0 – M18) and additional maps

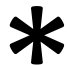

| Village | 0      |         | 3       |         | 6       |         | 9      |         | 12     |         | 15      |         | 18      |         |
|---------|--------|---------|---------|---------|---------|---------|--------|---------|--------|---------|---------|---------|---------|---------|
|         | I      | p-value | I       | p-value | I       | p-value | I      | p-value | I      | p-value | I       | p-value | I       | p-value |
| KNH     | 0.1702 | 0.0000  | 0.0031  | 0.7659  | 0.0354  | 0.0972  | 0.0019 | 0.7959  | 0.0465 | 0.0161  | 0.0284  | 0.1207  | -0.0133 | 0.6583  |
| TPN     | 0.0412 | 0.0867  | 0.0186  | 0.3084  | 0.0080  | 0.5798  | 0.0571 | 0.0021  | 0.0157 | 0.4169  | -0.0193 | 0.5805  | 0.0427  | 0.0447  |
| HKT     | 0.0347 | 0.0669  | 0.0440  | 0.0106  | 0.0034  | 0.7860  | 0.1384 | 0.0000  | 0.0284 | 0.0895  | 0.0503  | 0.0077  | 0.0741  | 0.0003  |
| TOT     | 0.2789 | 0.0000  | -0.0205 | 0.4534  | -0.0001 | 0.8947  | 0.0592 | 0.0120  | 0.0411 | 0.1468  | 0.0552  | 0.0137  | 0.0477  | 0.1879  |

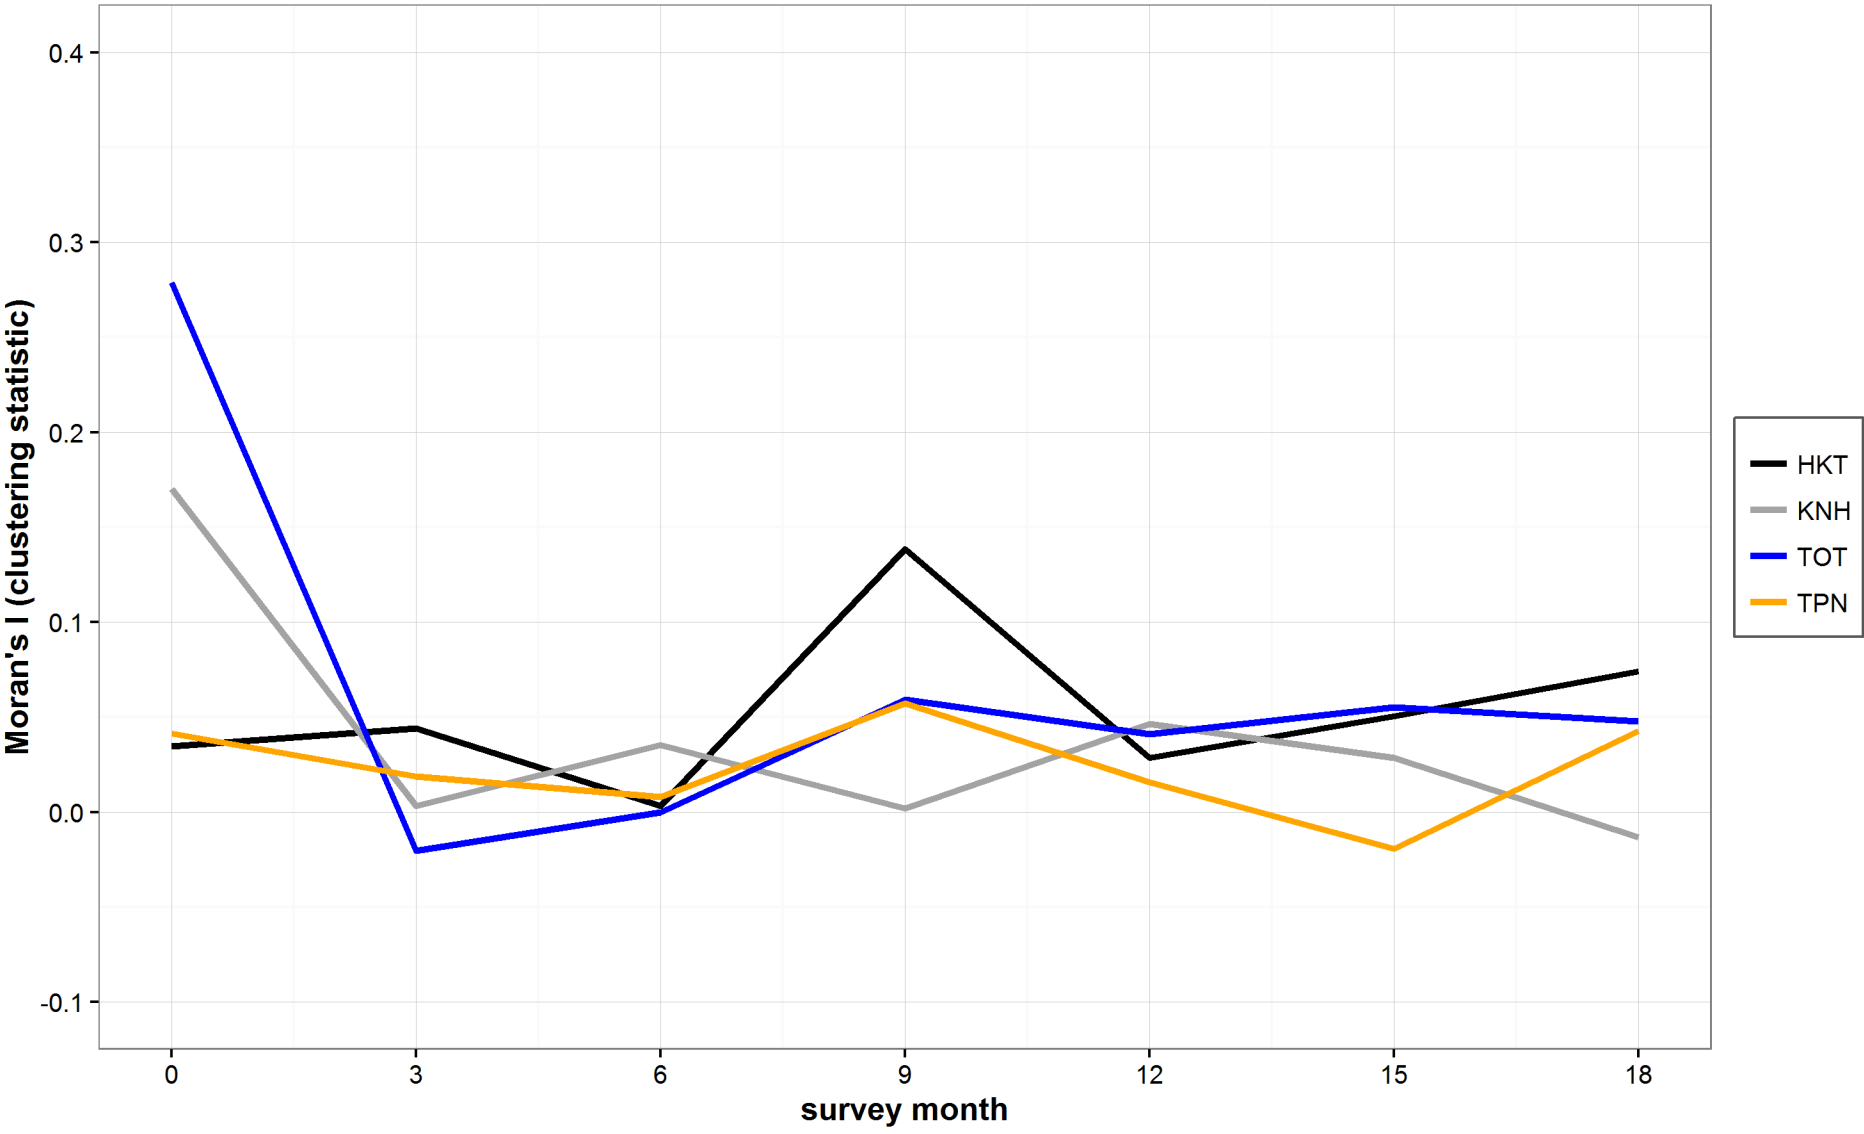

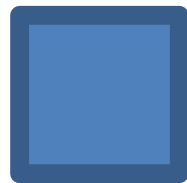

rainy season

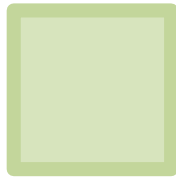

cool season

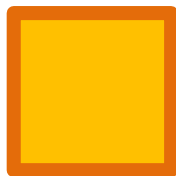

hot season

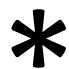

sig. Moran's I

KNH

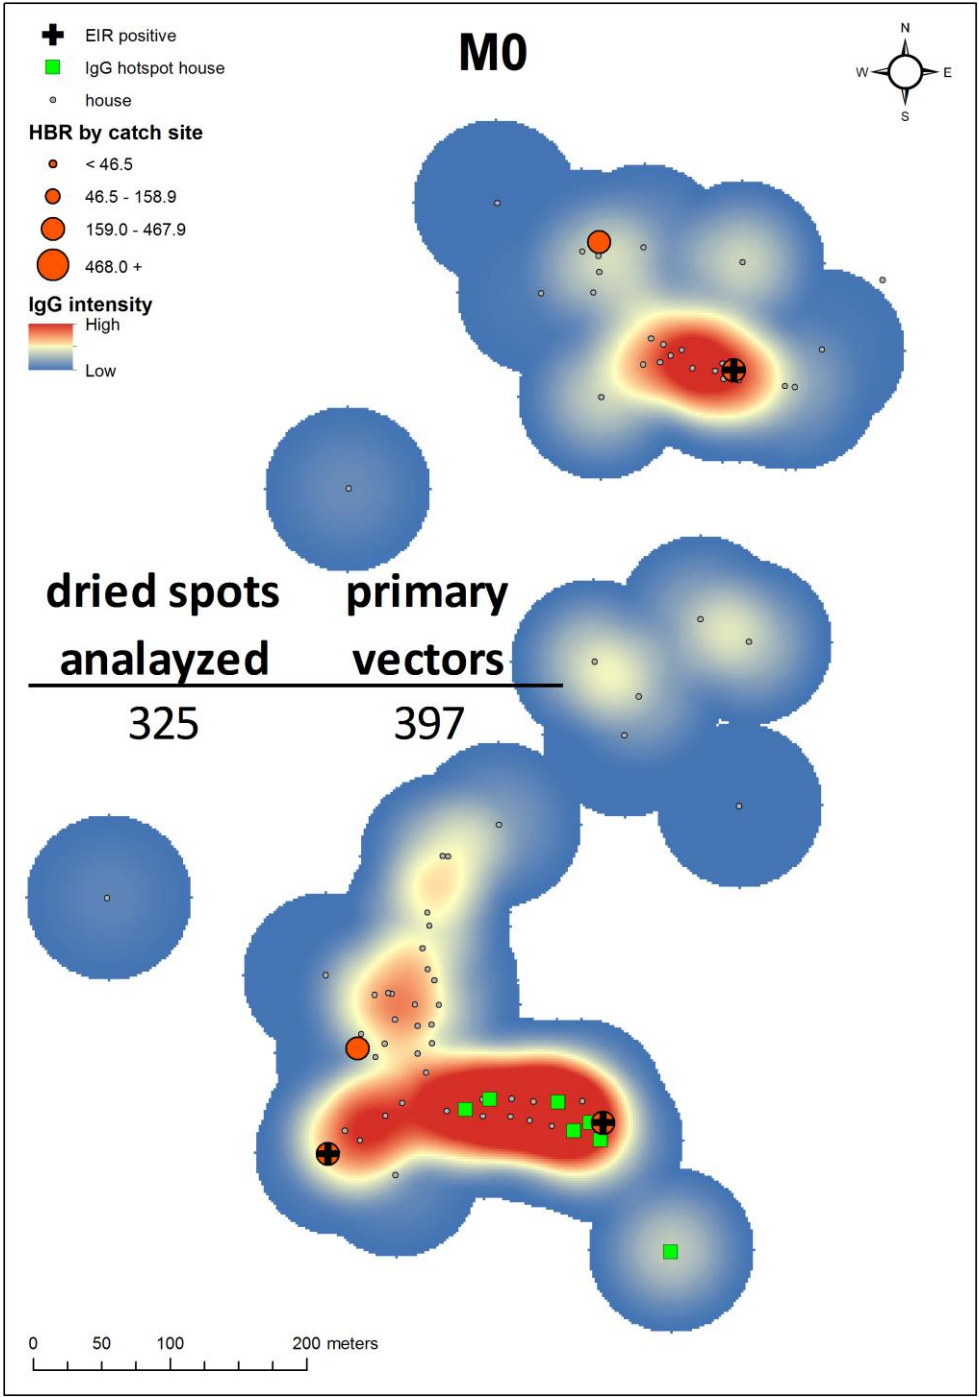

# M3

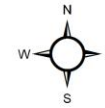

- ✚ EIR positive
- IgG hotspot house
- house

### HBR by catch site

- < 46.5
- 46.5 - 158.9
- 159.0 - 467.9
- 468.0 +

### IgG intensity

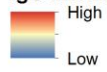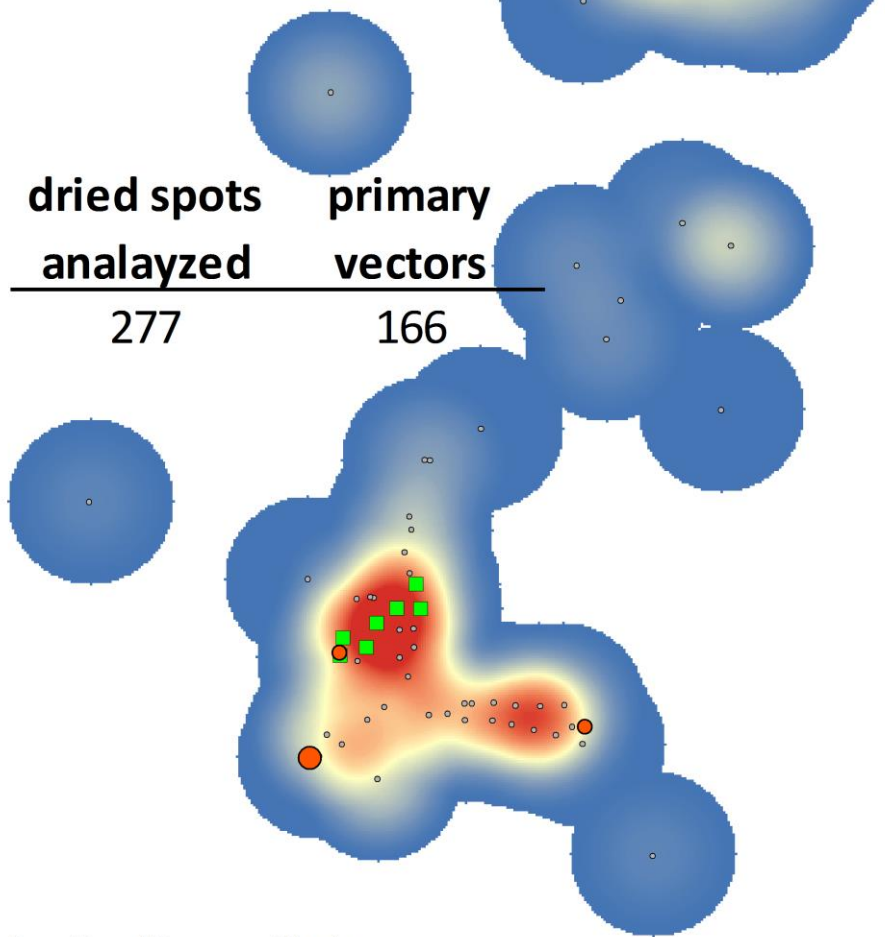

**dried spots  
analyzed**

277

**primary  
vectors**

166

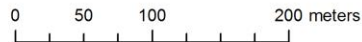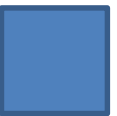

# M6



- ✚ EIR positive
- IgG hotspot house
- house

### HBR by catch site

- < 46.5
- 46.5 - 158.9
- 159.0 - 467.9
- 468.0 +

### IgG intensity

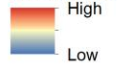

**dried spots analyzed**      **primary vectors**

---

263                      264

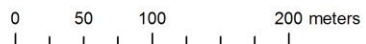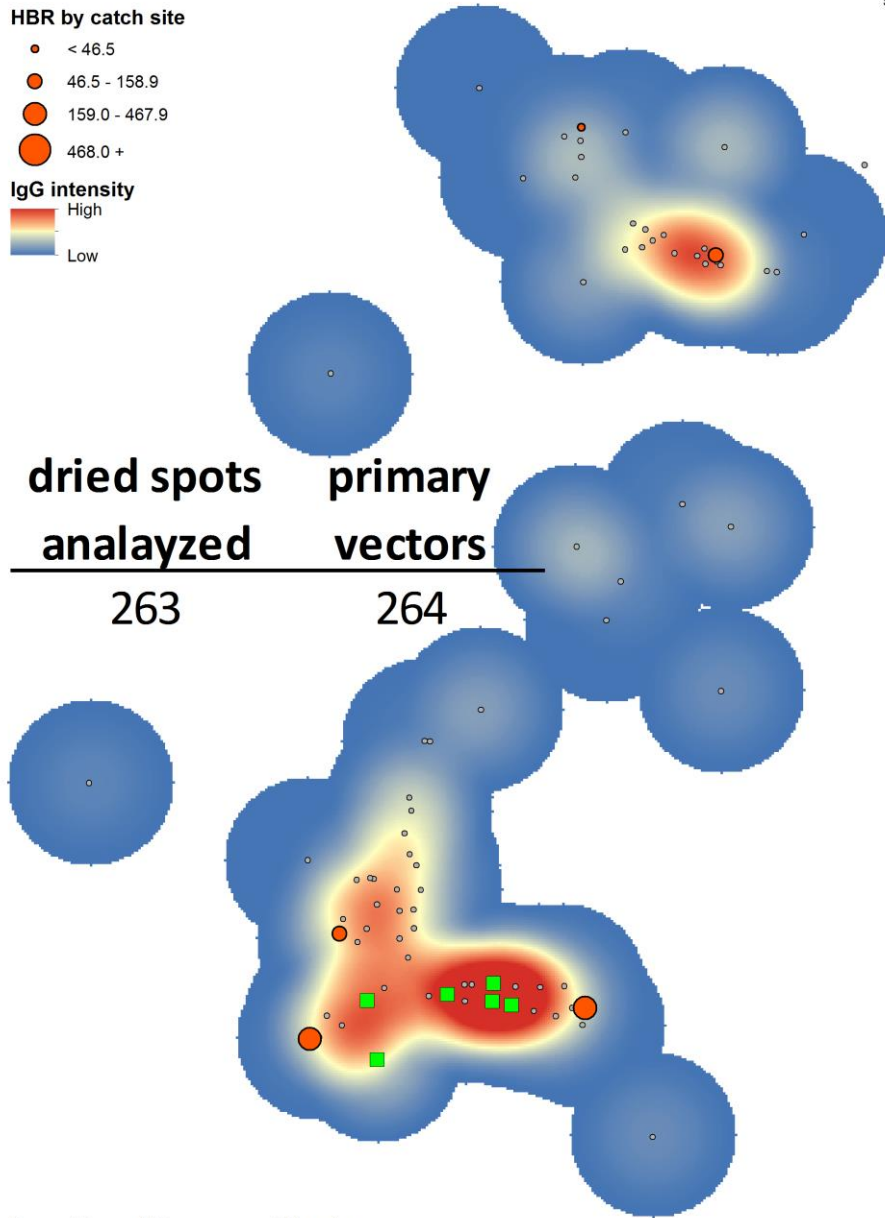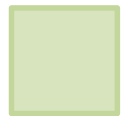

# M9



- +
- 
- 

### HBR by catch site

- < 46.5
- 46.5 - 158.9
- 159.0 - 467.9
- 468.0 +

### IgG intensity

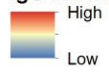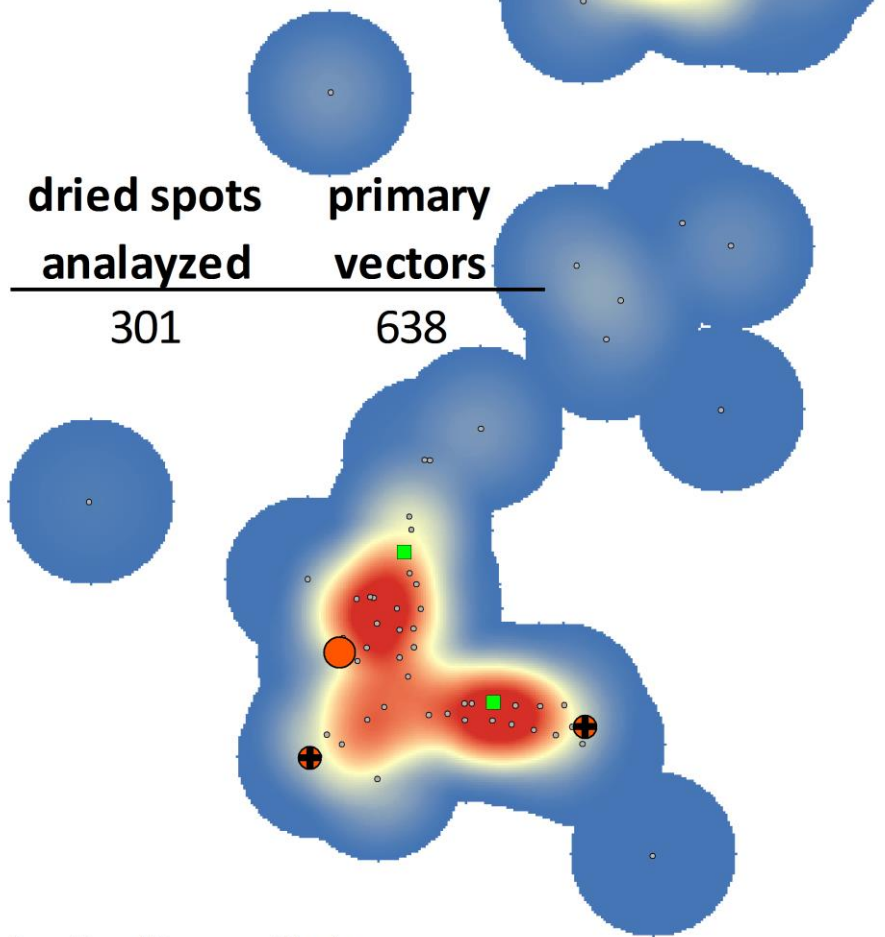

dried spots  
analyzed

301

primary  
vectors

638

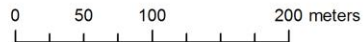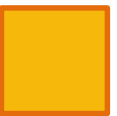



# M12

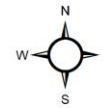

- ✚ EIR positive
- IgG hotspot house
- house

### HBR by catch site

- < 46.5
- 46.5 - 158.9
- 159.0 - 467.9
- 468.0 +

### IgG intensity

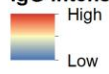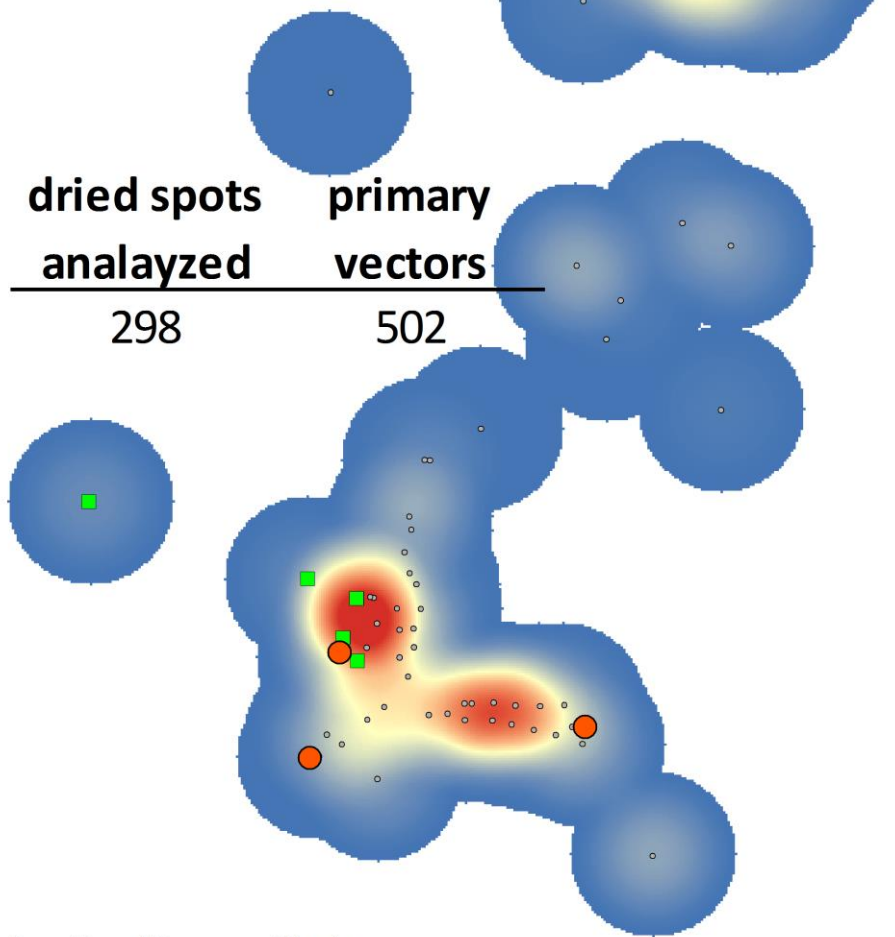

**dried spots  
analyzed**

298

**primary  
vectors**

502

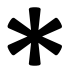

# M15

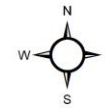

- ✚ EIR positive
- IgG hotspot house
- house

### HBR by catch site

- < 46.5
- 46.5 - 158.9
- 159.0 - 467.9
- 468.0 +

### IgG intensity

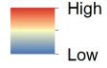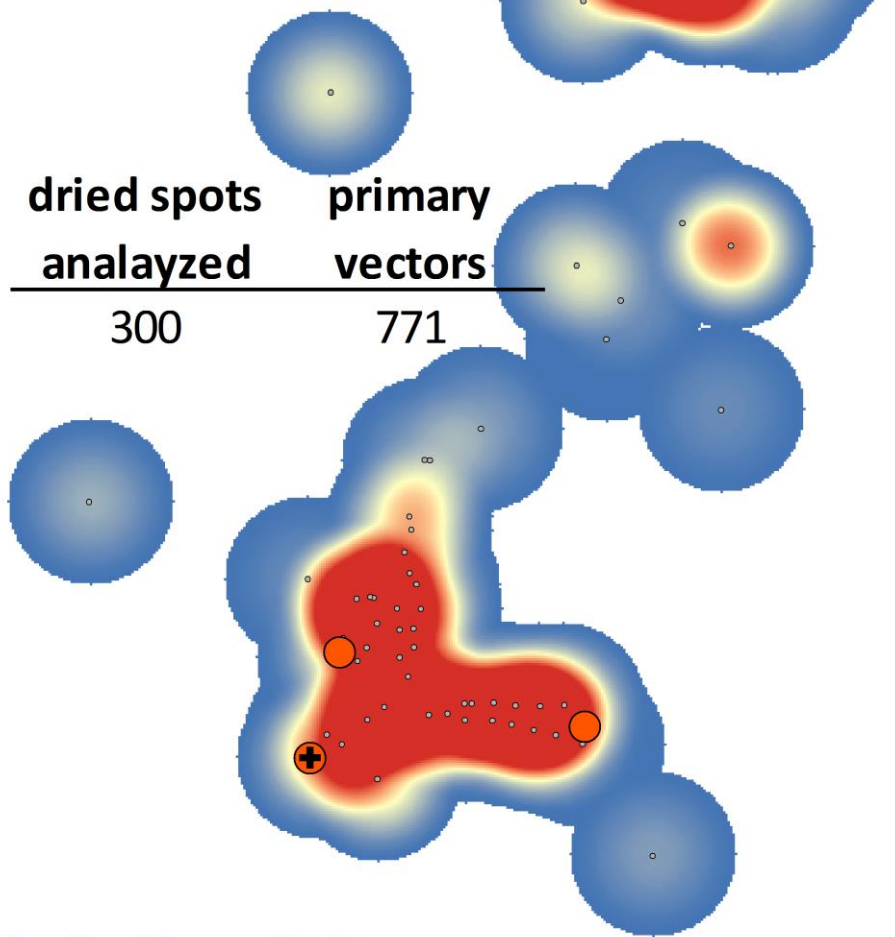

**dried spots  
analyzed**

**primary  
vectors**

300

771

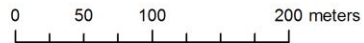

# M18

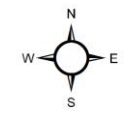

- ✚ EIR positive
- IgG hotspot house
- house

### HBR by catch site

- < 46.5
- 46.5 - 158.9
- 159.0 - 467.9
- 468.0 +

### IgG intensity



**dried spots**      **primary**  
**analyzed**      **vectors**

---

282                      87

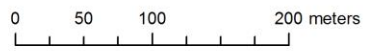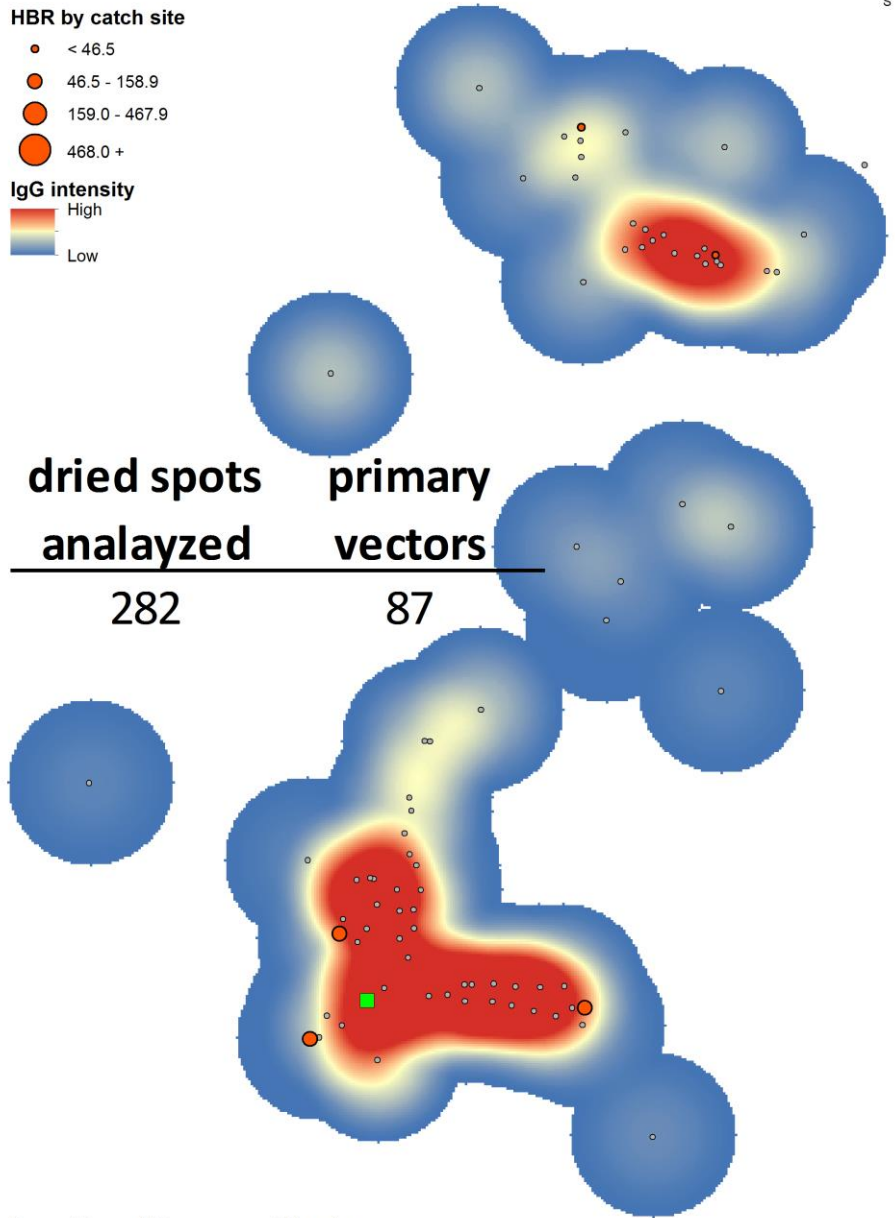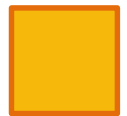

TPN

# MO

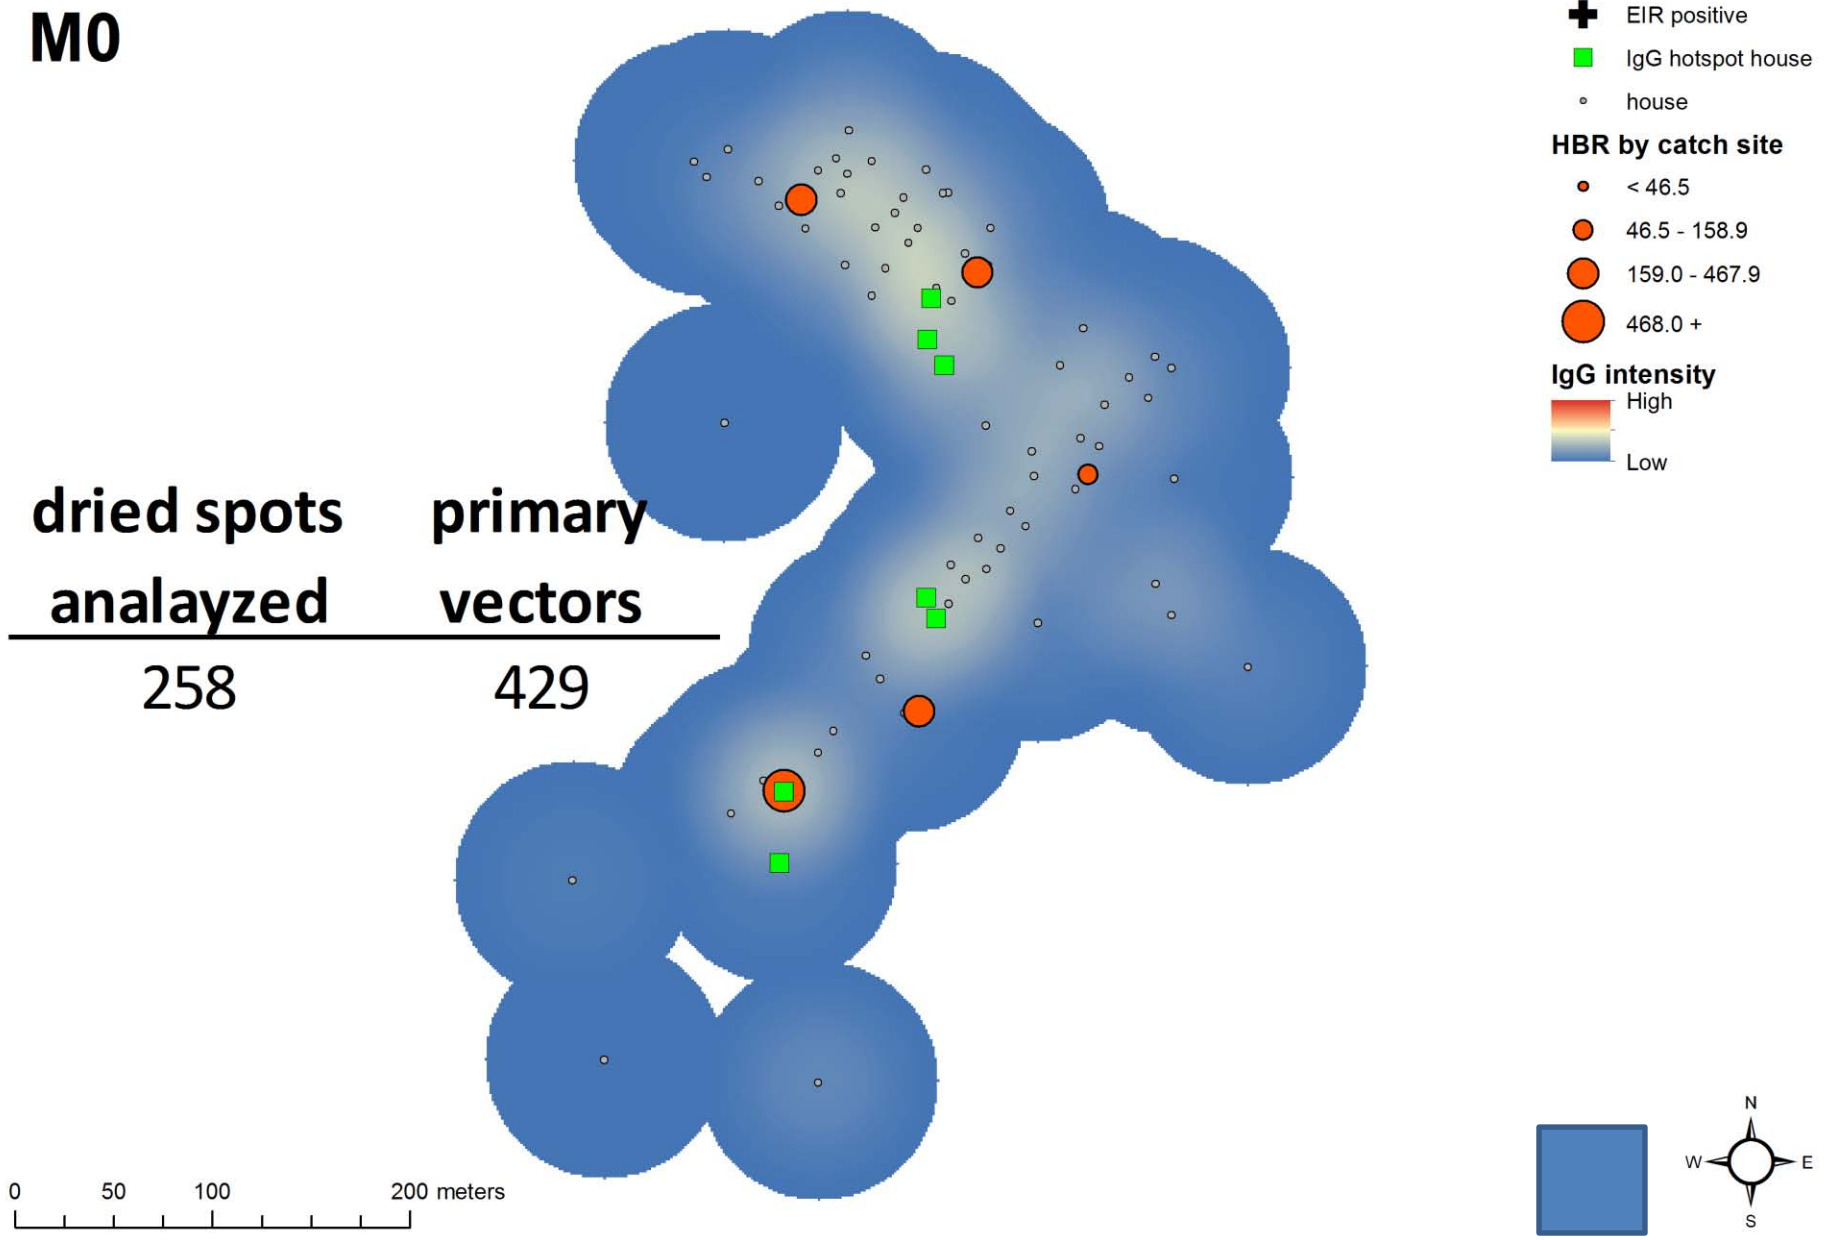

# M3

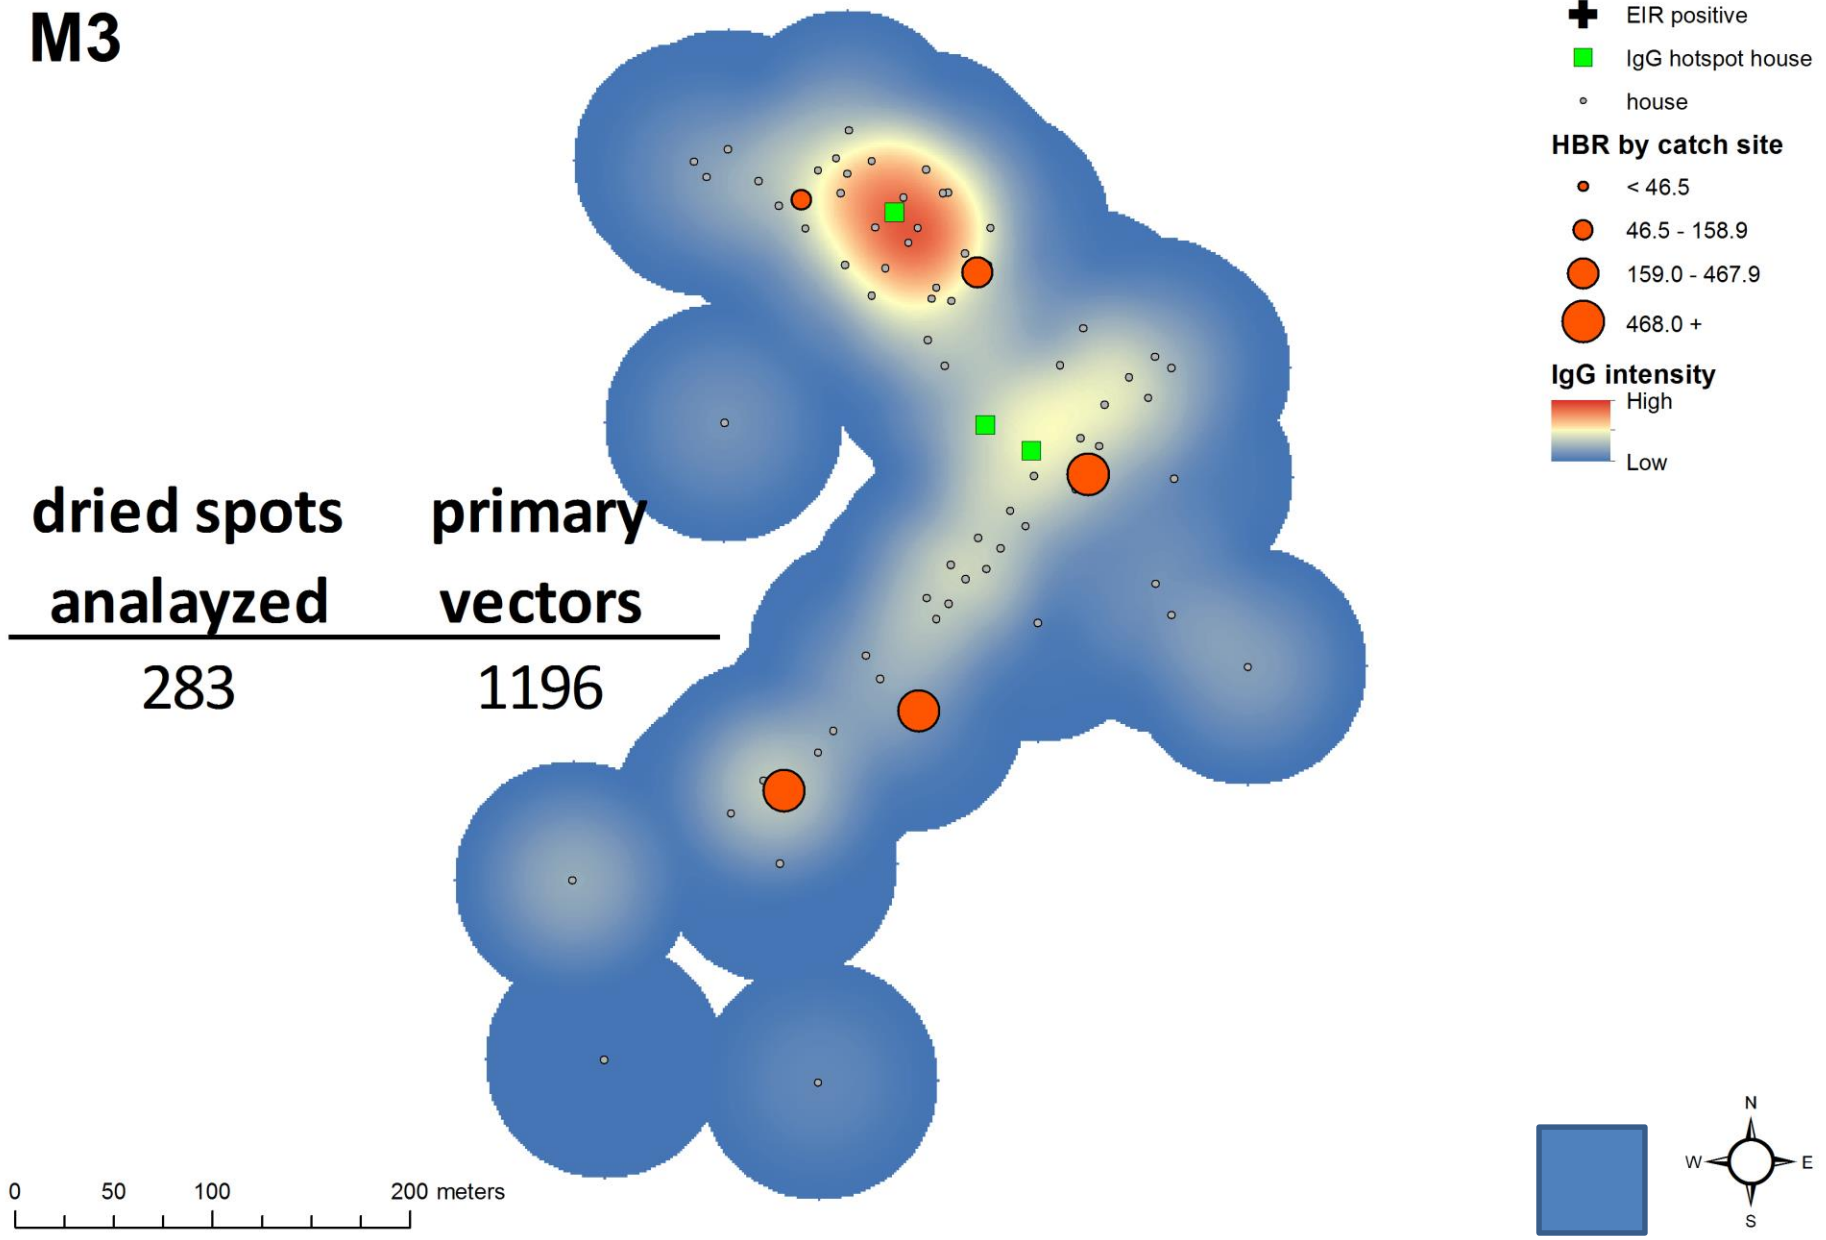

# M6

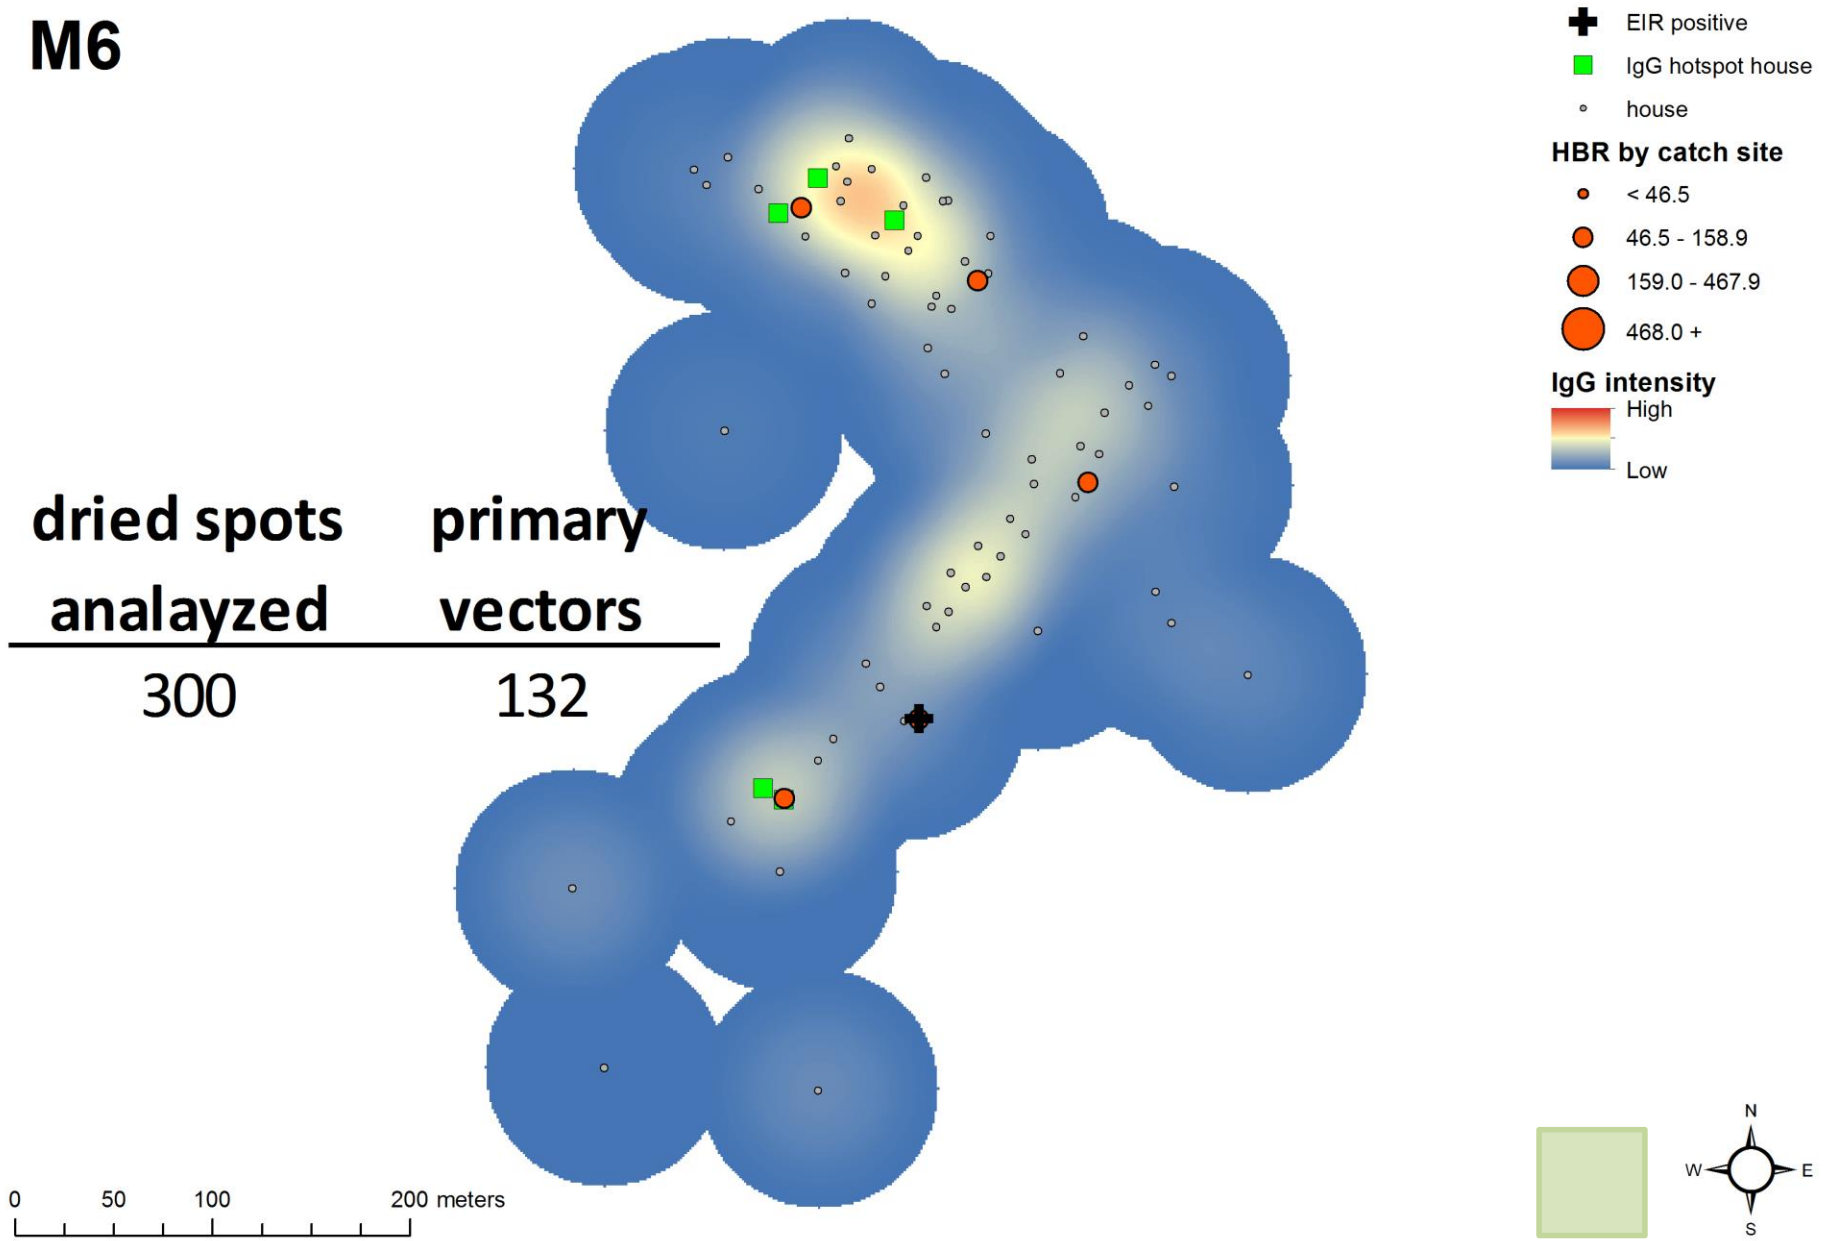

# M9

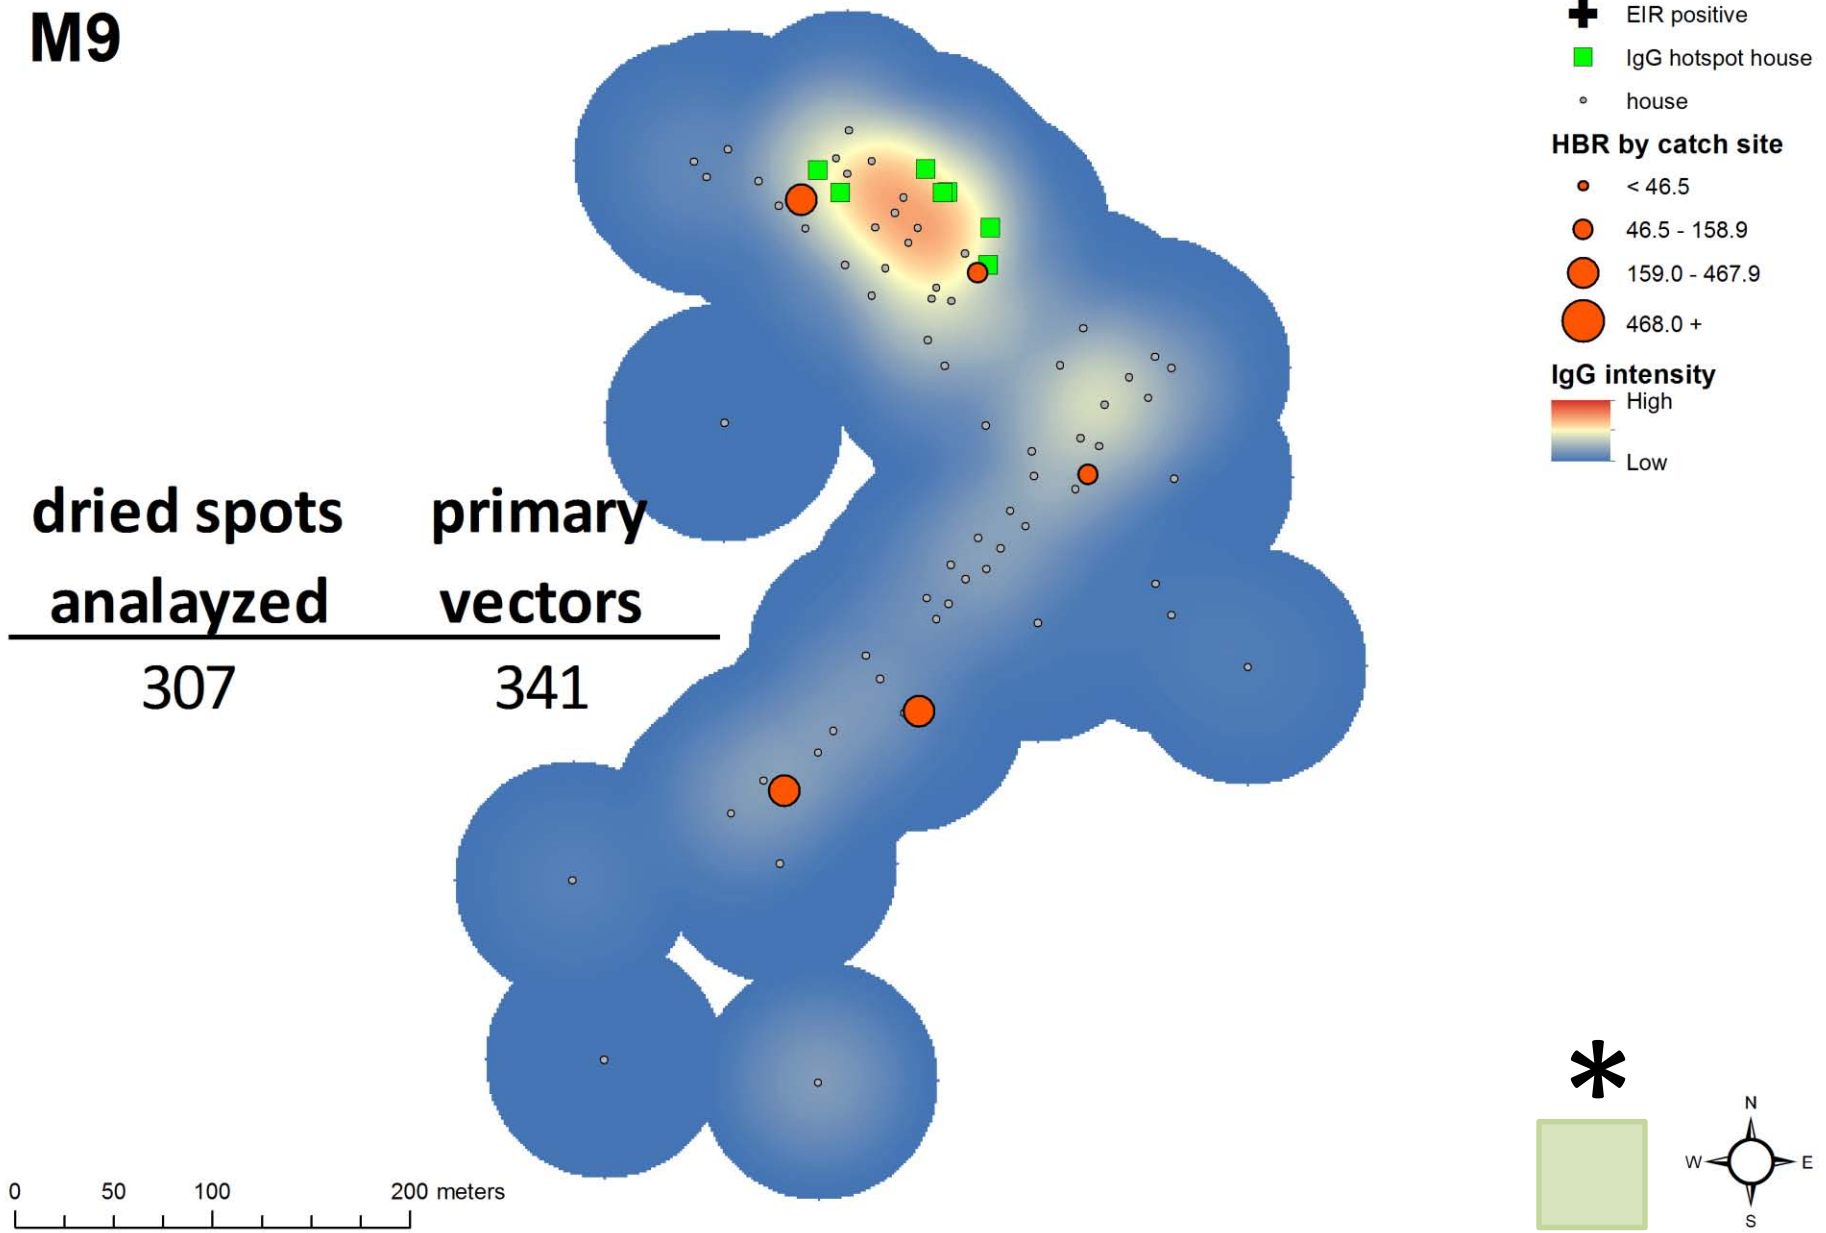



# M12

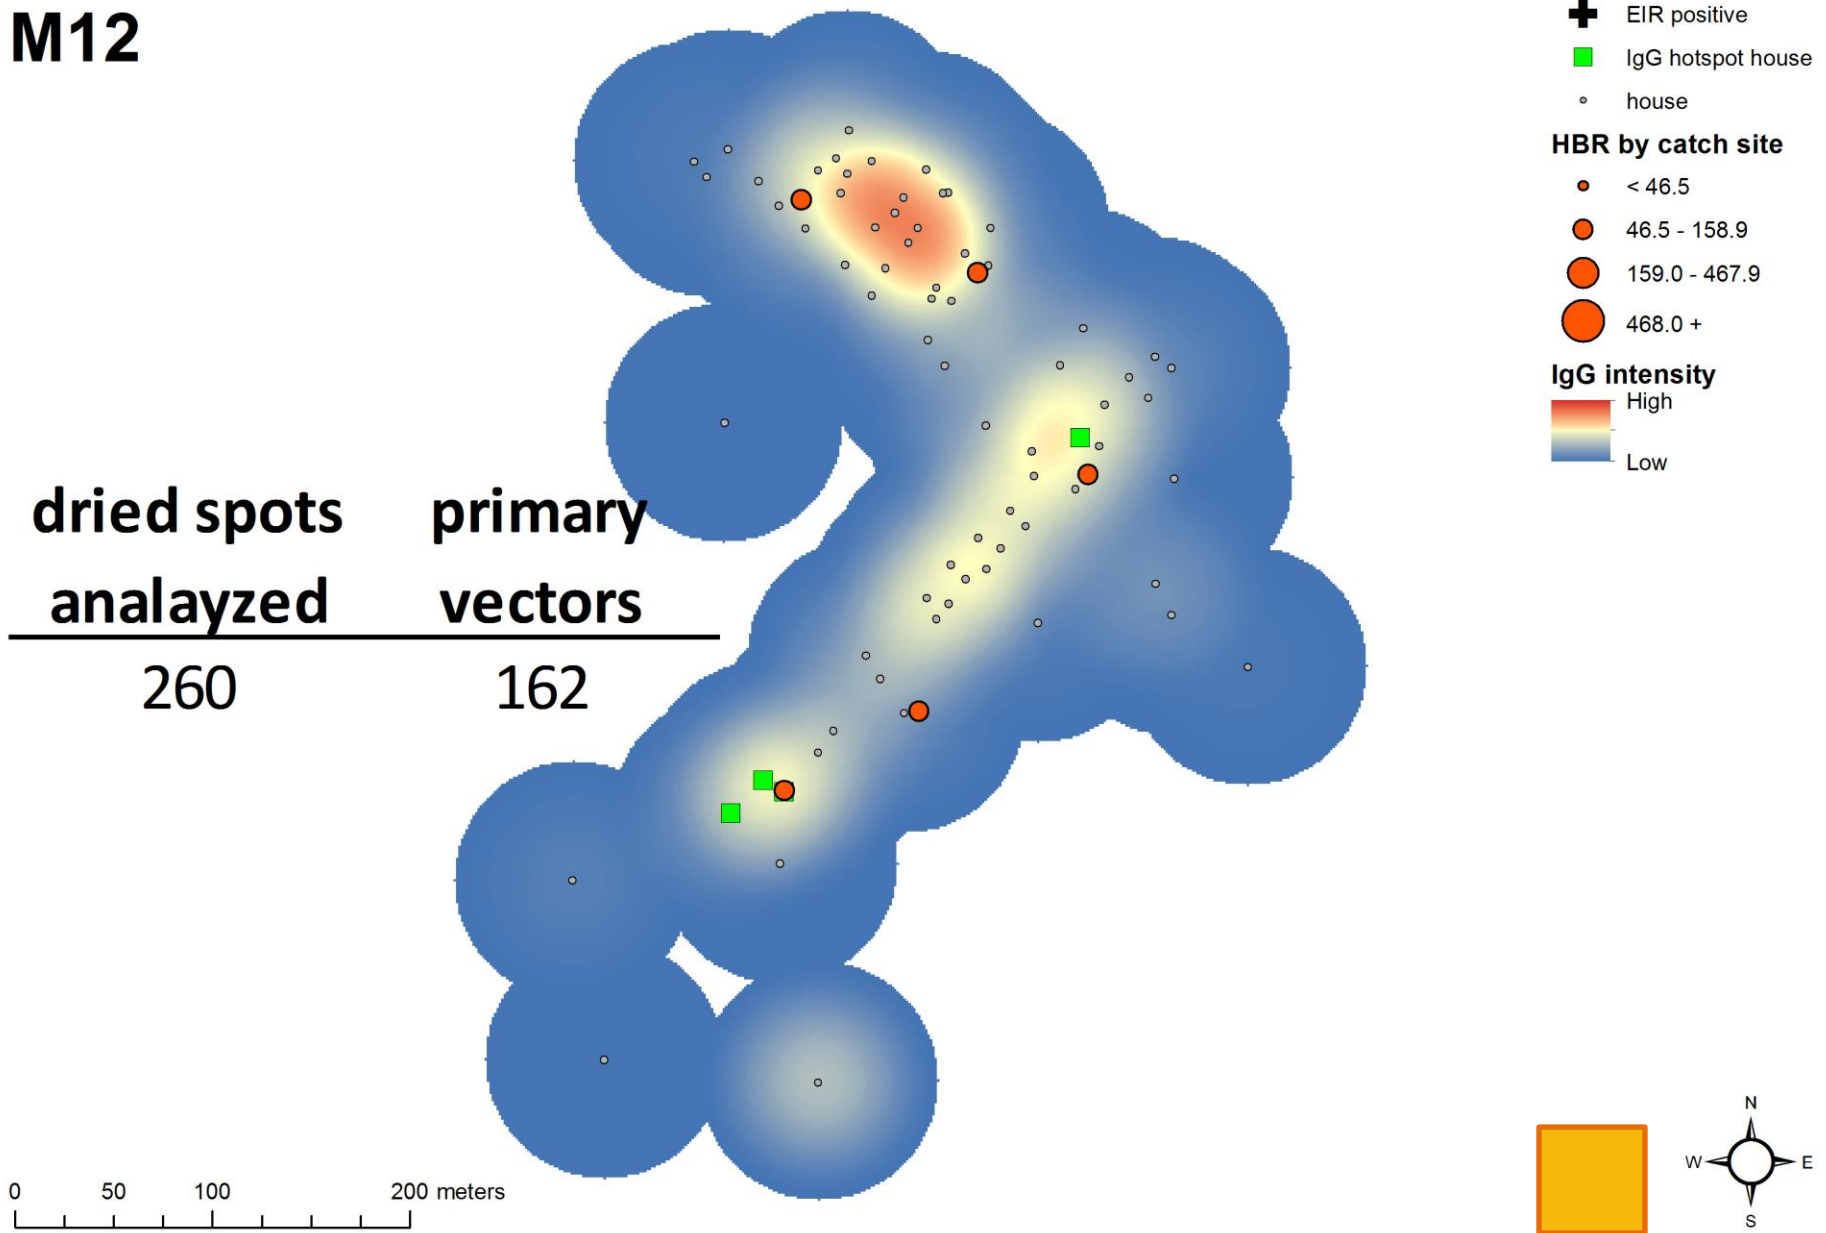

# M15

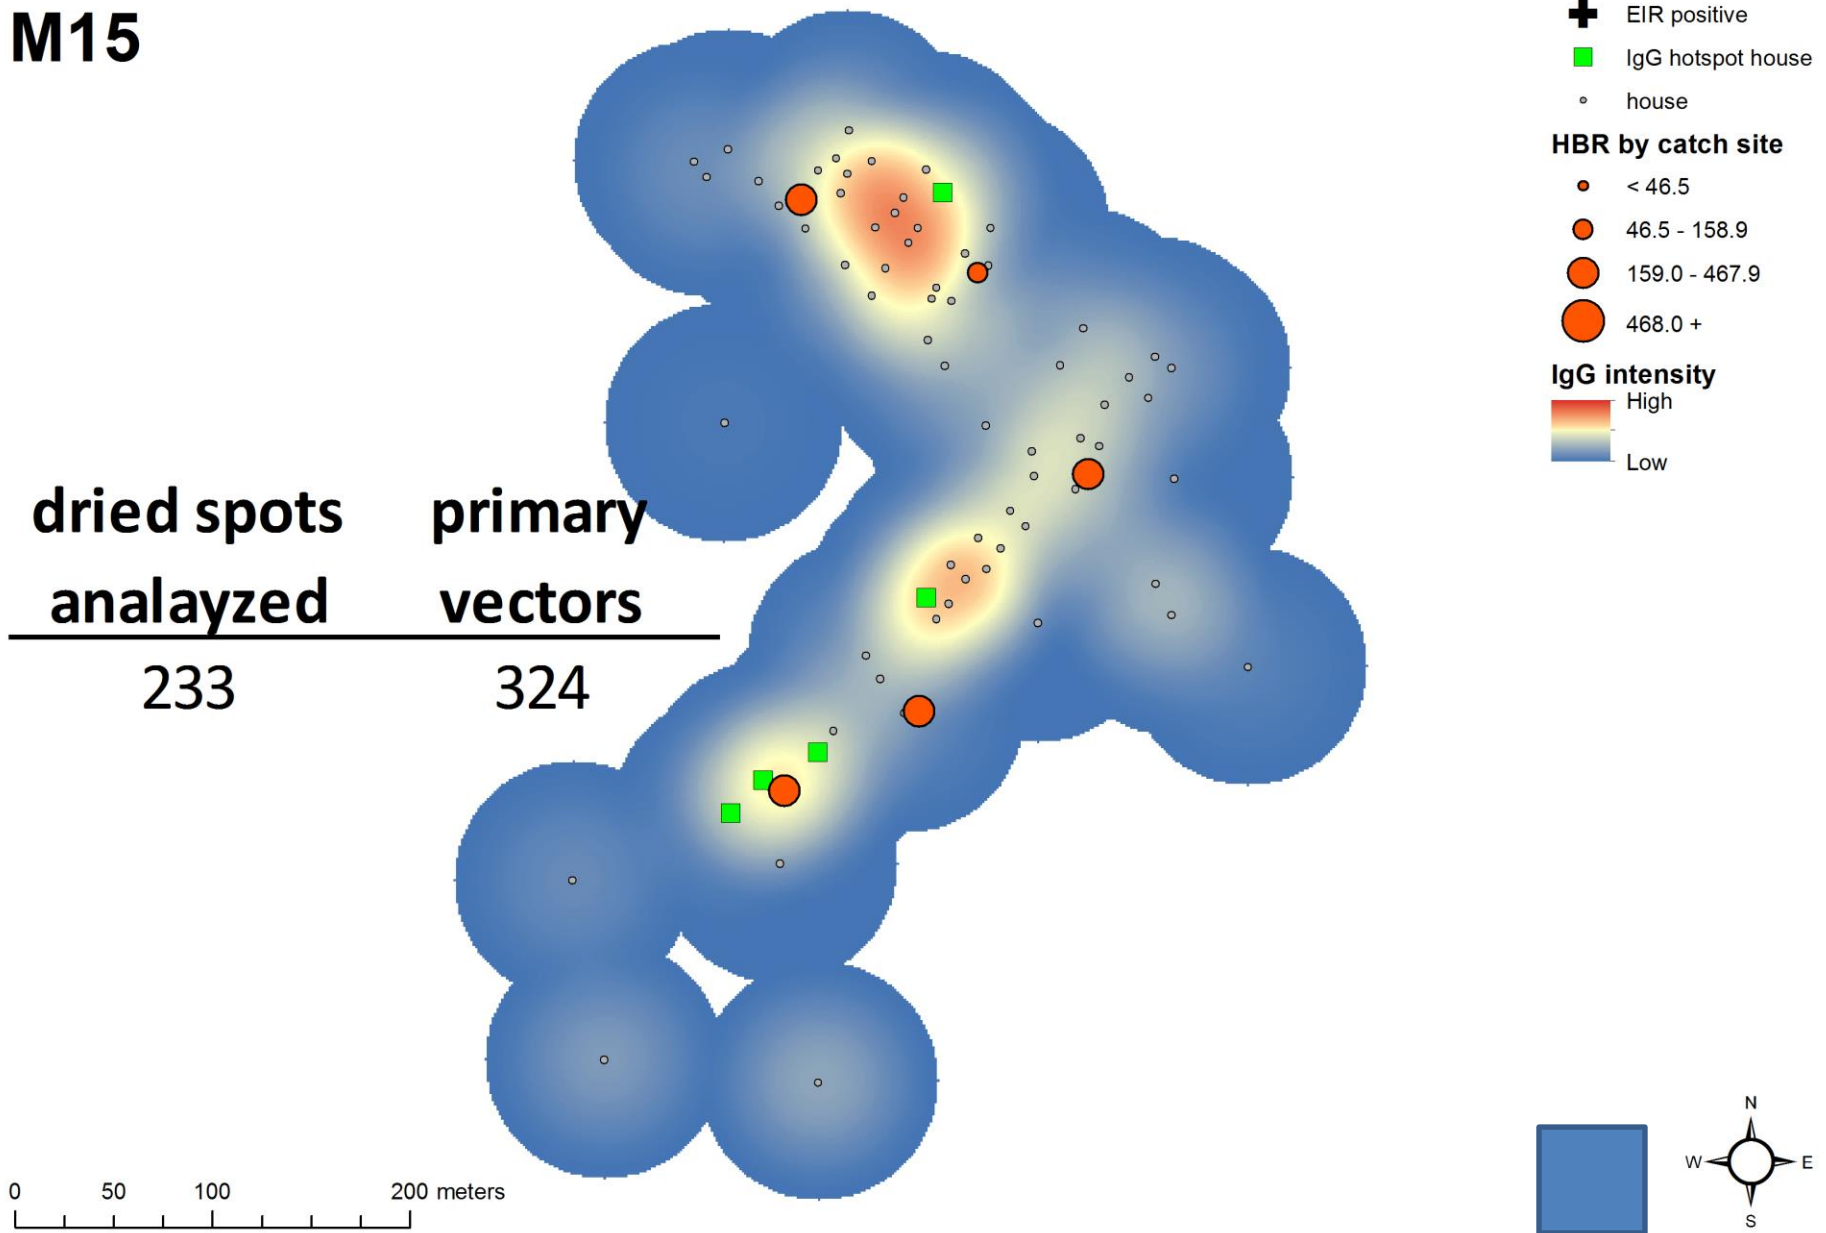

# M18

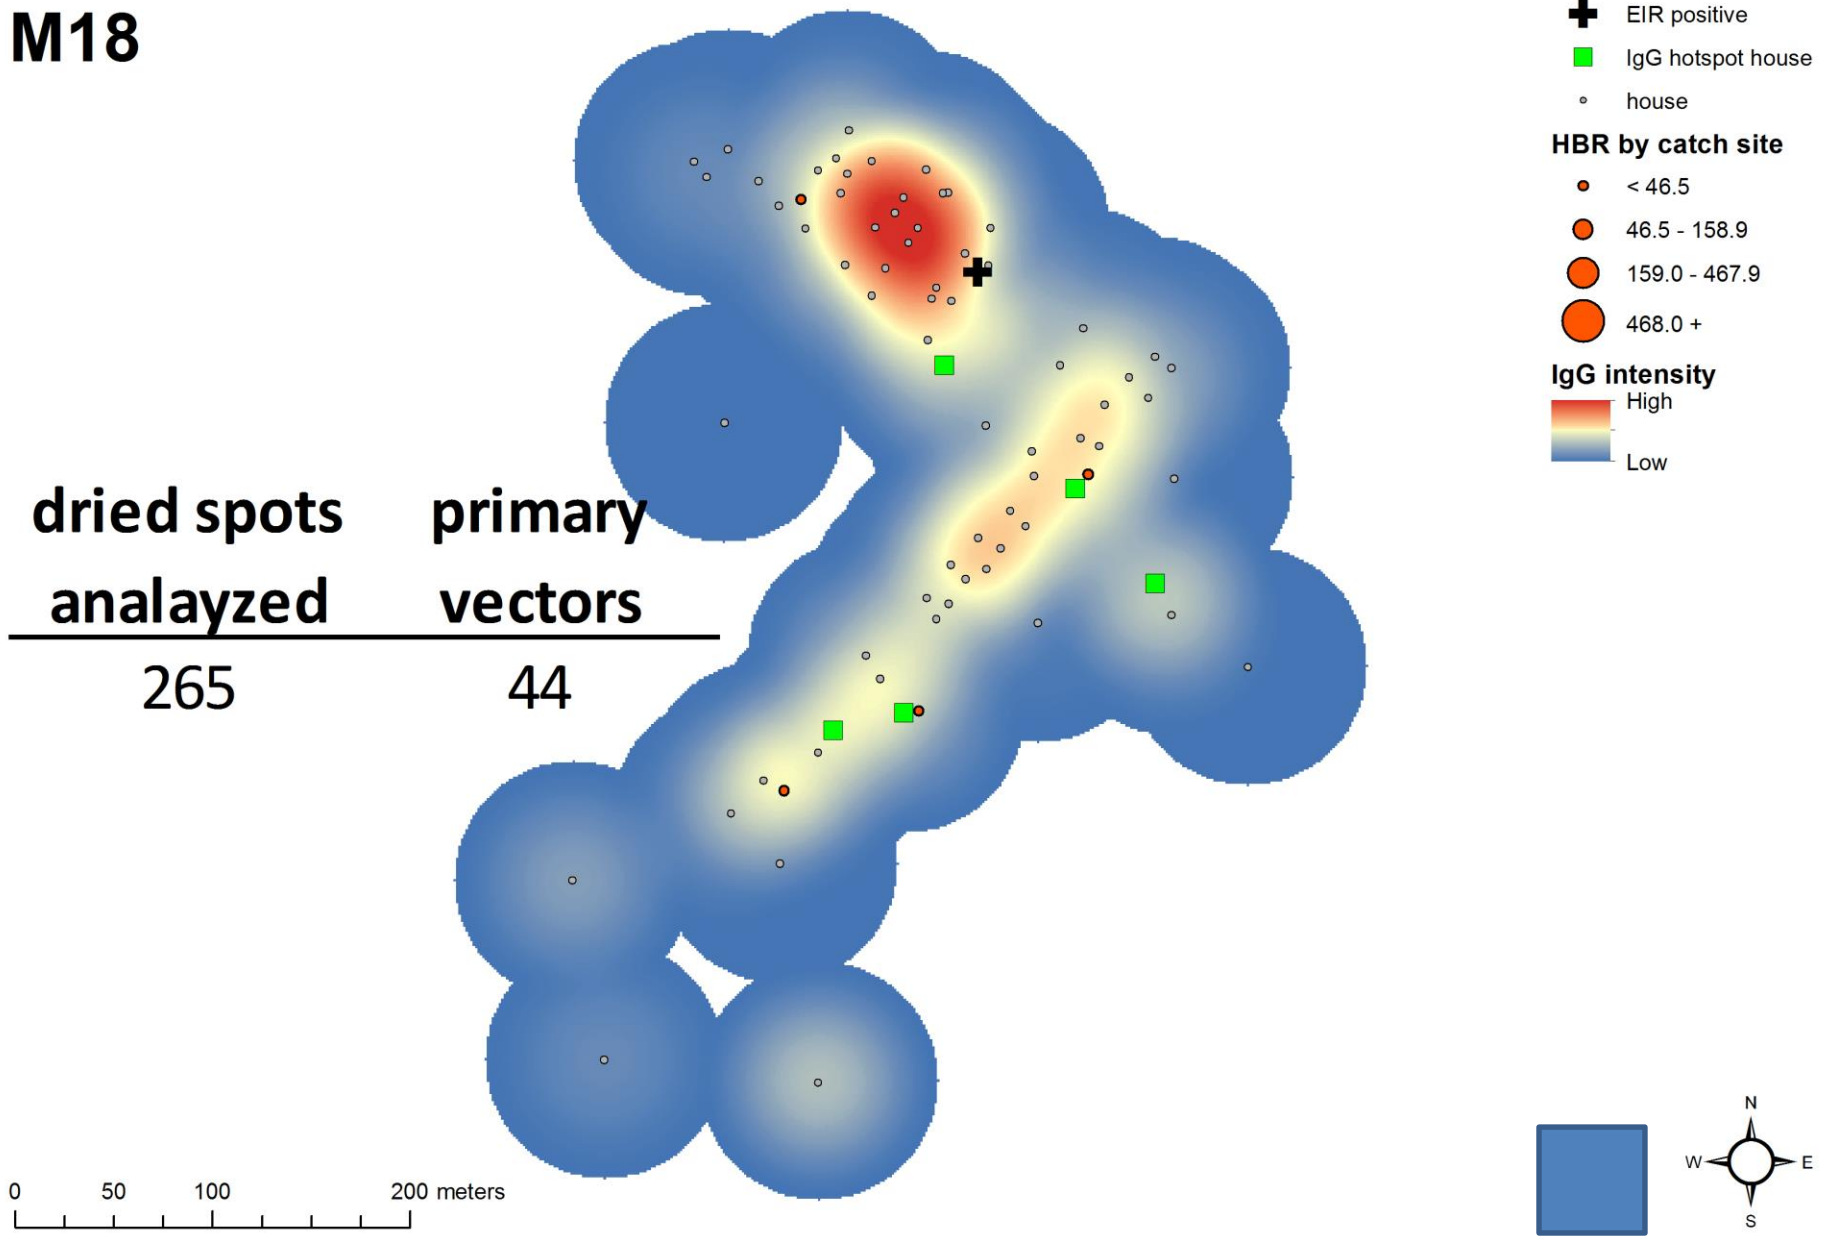

HKT

# M0

dried spots  
analyzed

490

primary  
vectors

894

- ⊕ EIR positive
- IgG hotspot house
- house

HBR by catch site

- < 46.5
- 46.5 - 158.9
- 159.0 - 467.9
- 468.0 +

IgG intensity

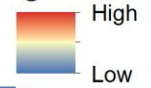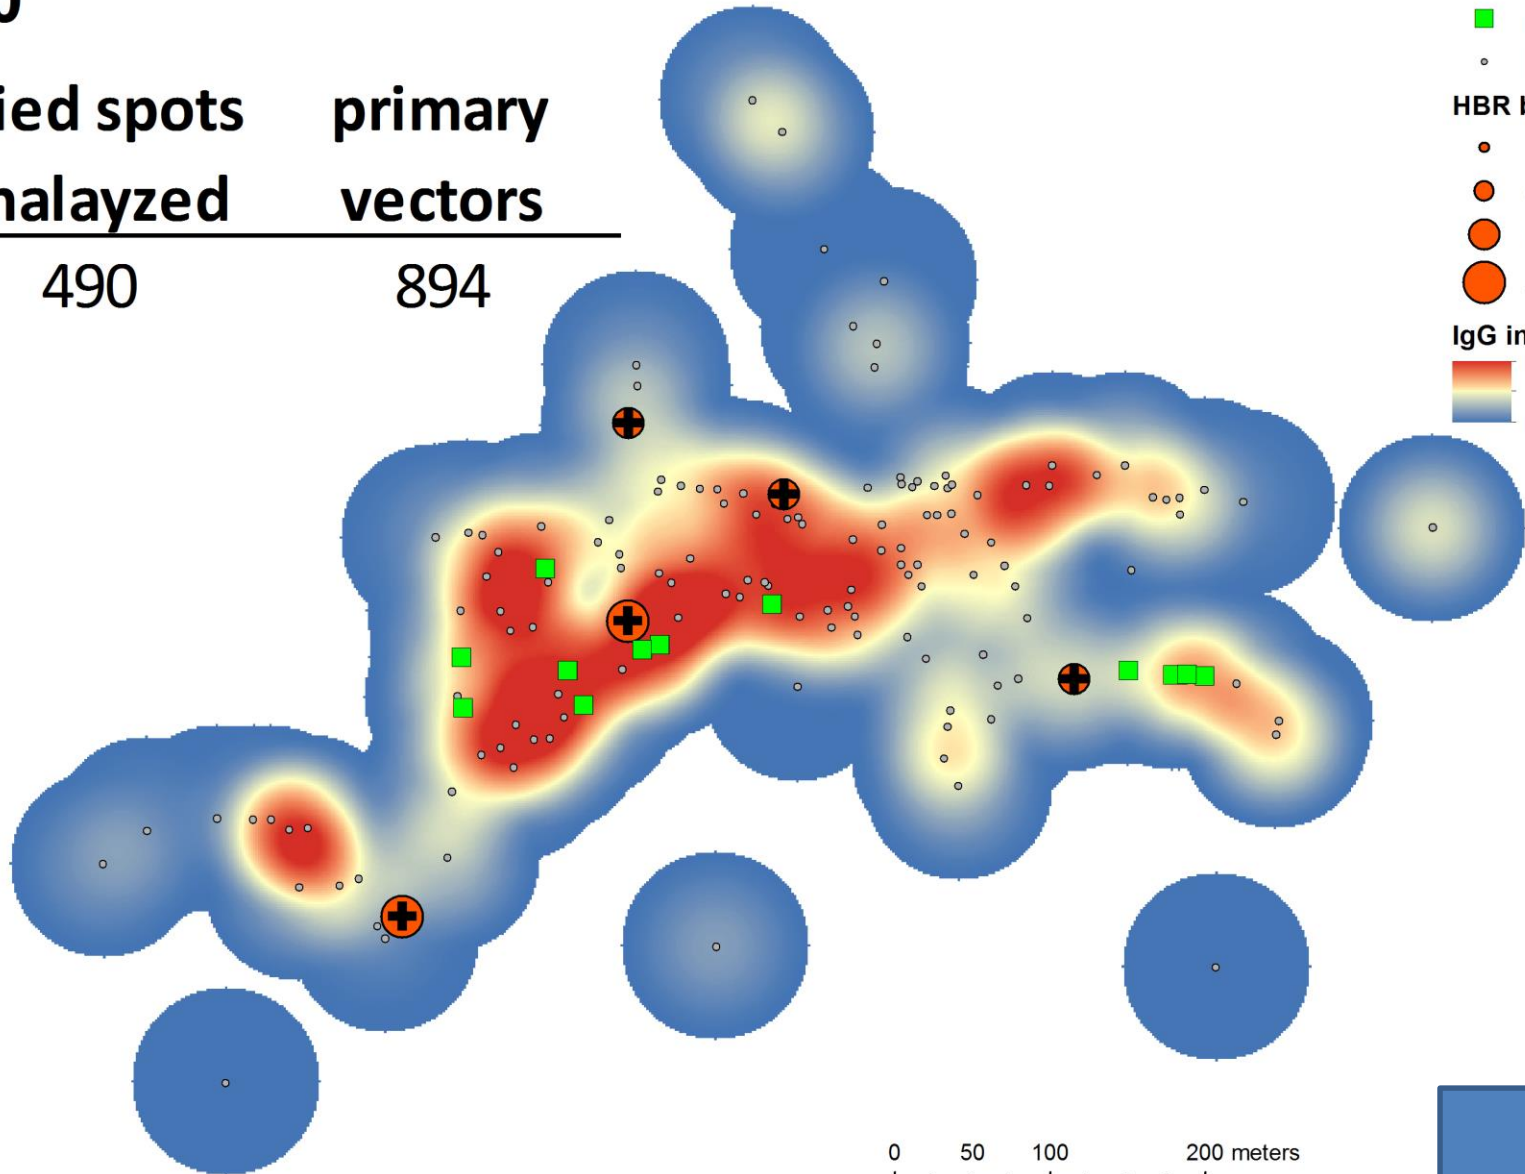

0 50 100 200 meters

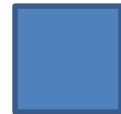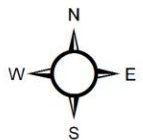

# M3

dried spots  
analyzed

535

primary  
vectors

53

- ✚ EIR positive
- IgG hotspot house
- house

HBR by catch site

- < 46.5
- 46.5 - 158.9
- 159.0 - 467.9
- 468.0 +

IgG intensity

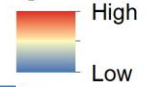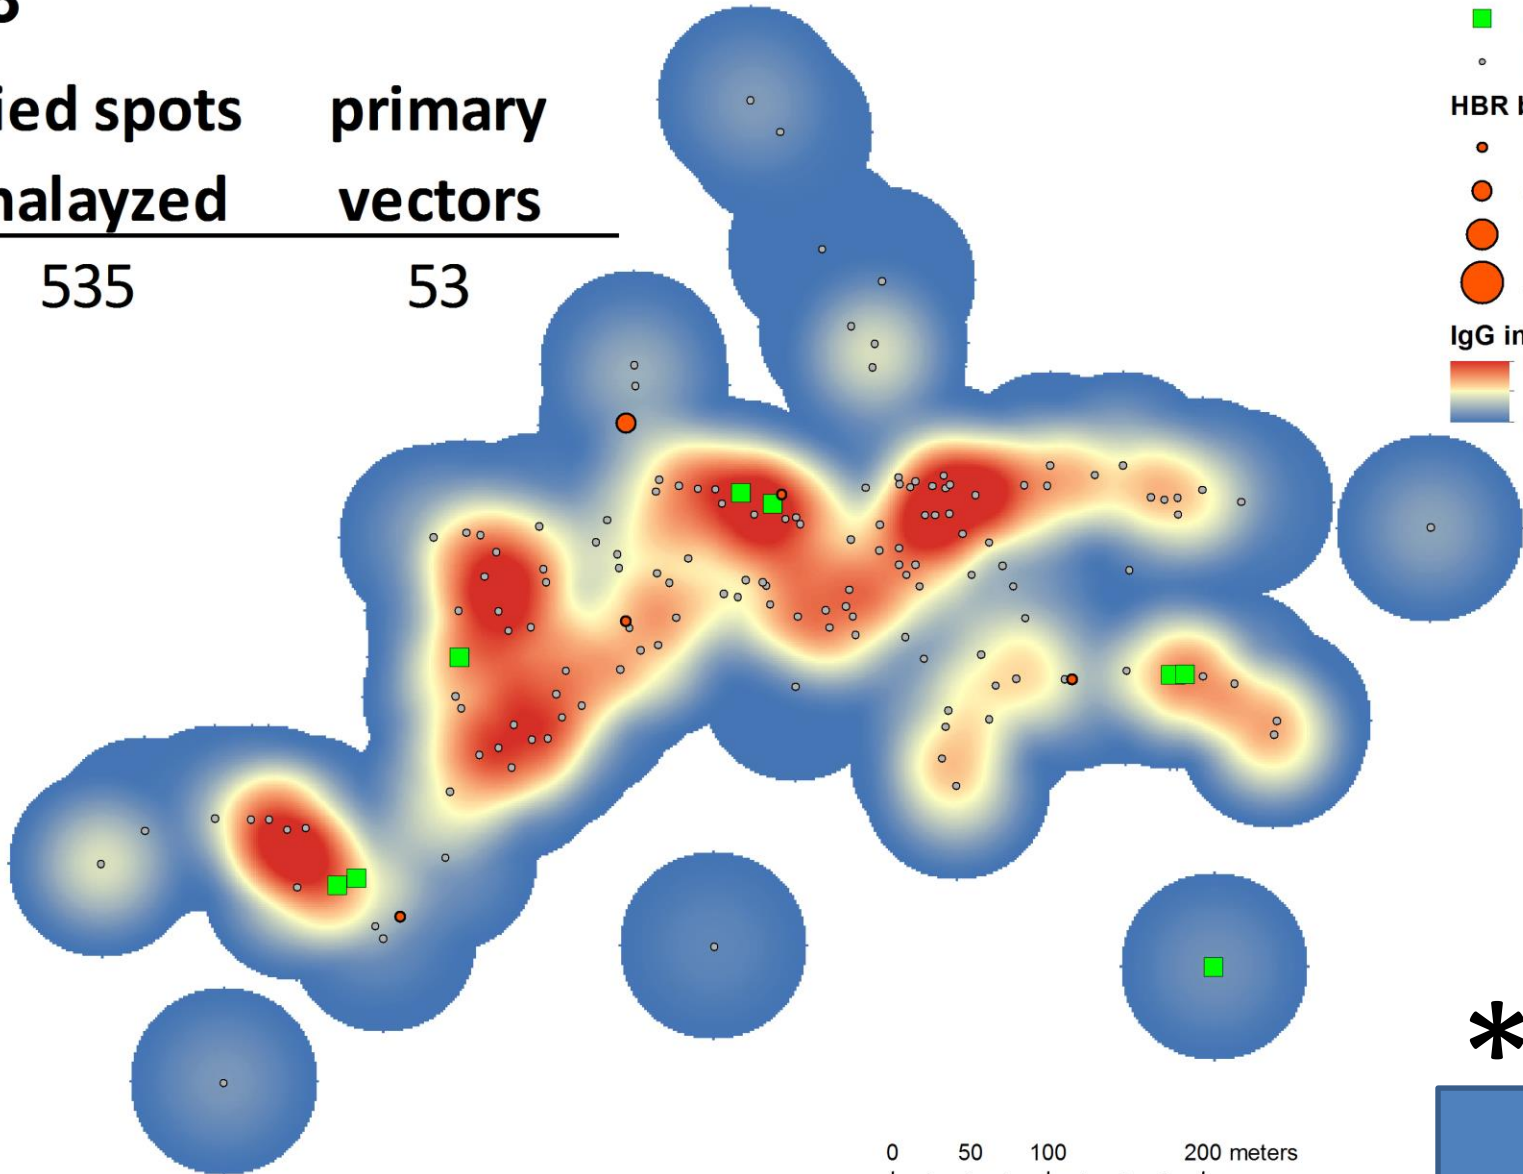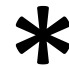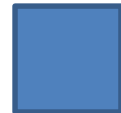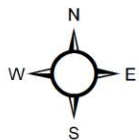

# M6

dried spots  
analyzed

500

primary  
vectors

38

- ✚ EIR positive
- IgG hotspot house
- house

HBR by catch site

- < 46.5
- 46.5 - 158.9
- 159.0 - 467.9
- 468.0 +

IgG intensity

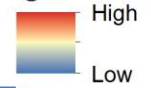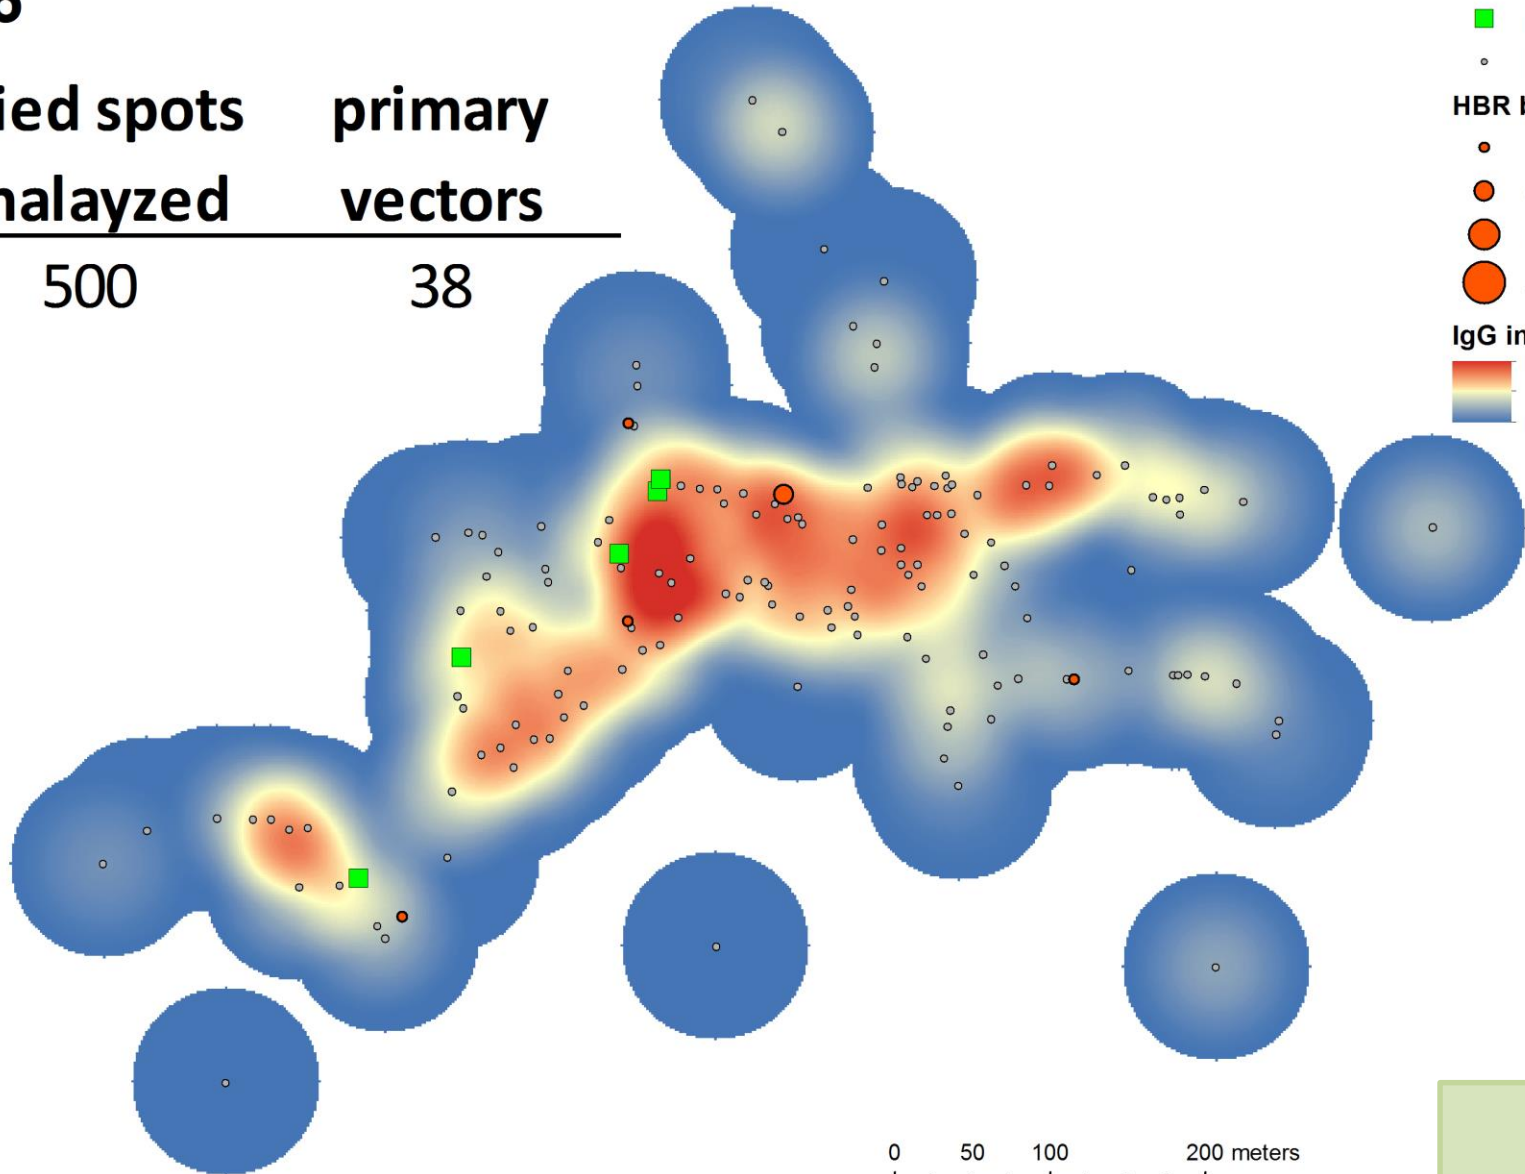

0 50 100 200 meters

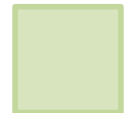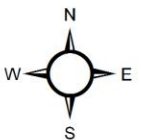

# M9

dried spots  
analyzed

478

primary  
vectors

605

- ⊕ EIR positive
- IgG hotspot house
- house

HBR by catch site

- < 46.5
- 46.5 - 158.9
- 159.0 - 467.9
- 468.0 +

IgG intensity

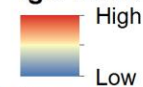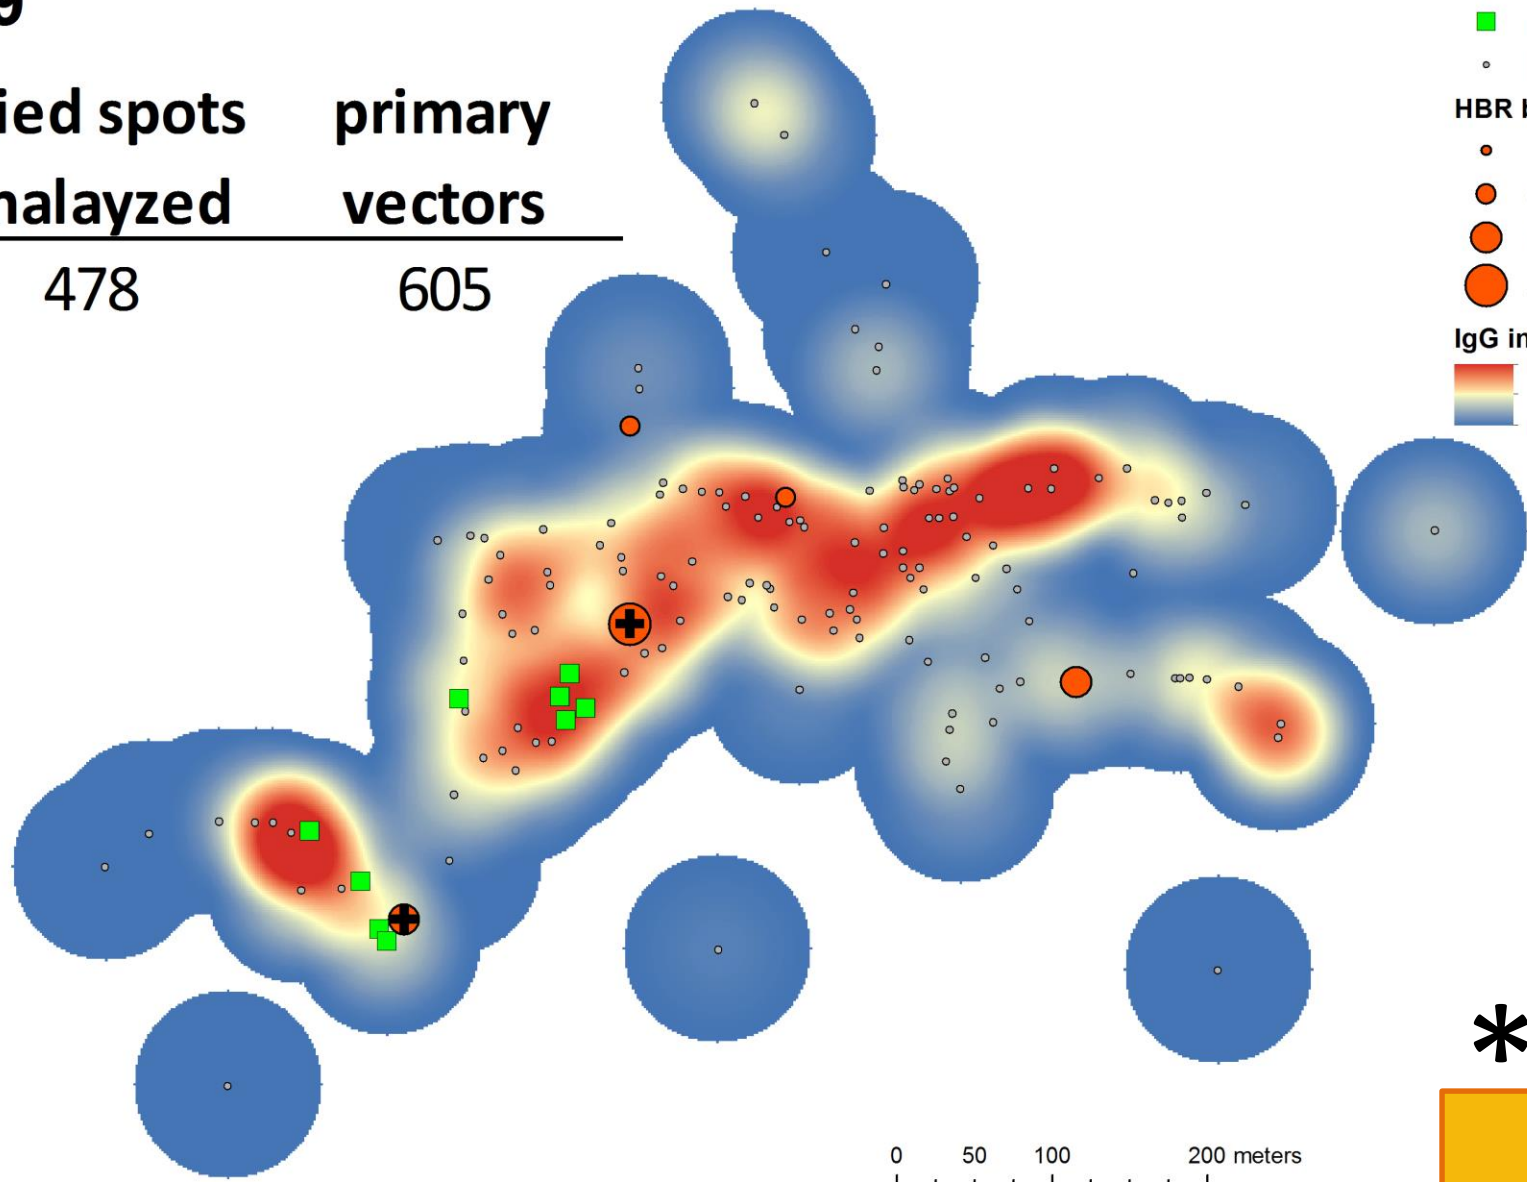

0 50 100 200 meters

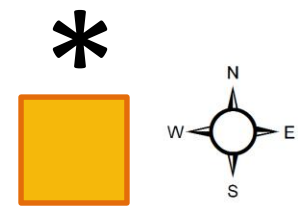



# M12

dried spots  
analyzed

527

primary  
vectors

357

- ✚ EIR positive
- IgG hotspot house
- house

HBR by catch site

- < 46.5
- 46.5 - 158.9
- 159.0 - 467.9
- 468.0 +

IgG intensity

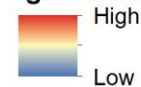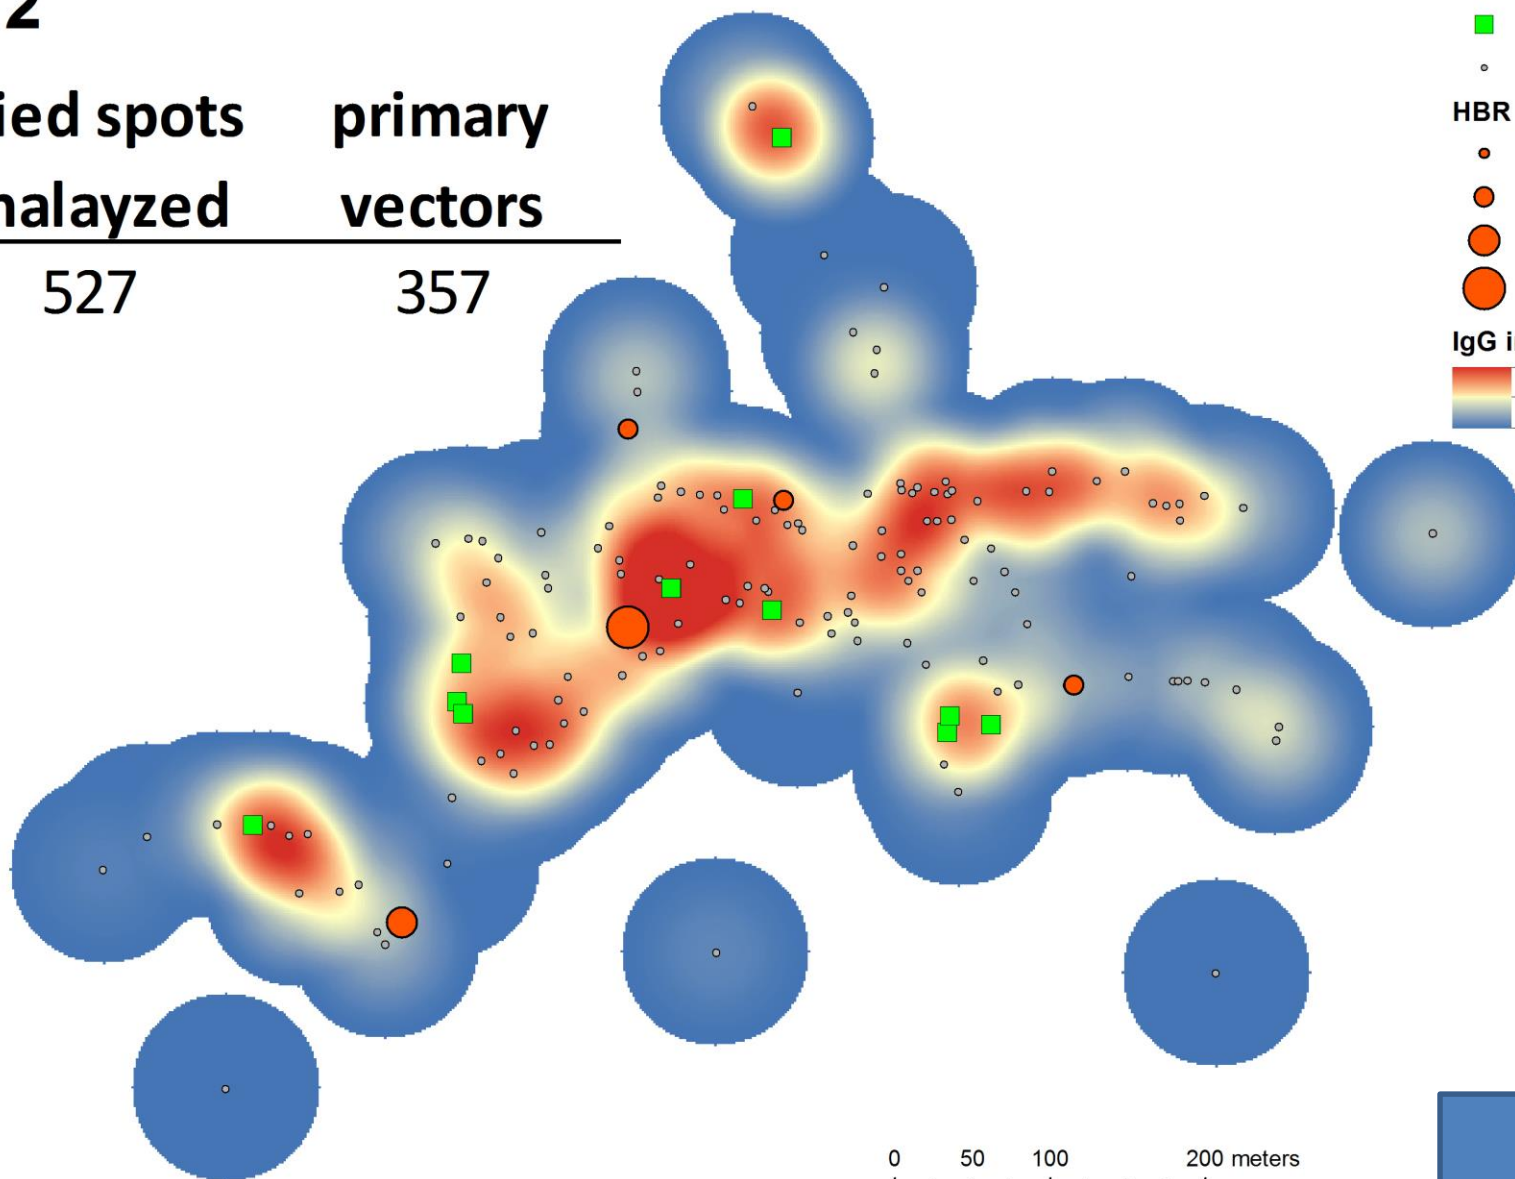

0 50 100 200 meters

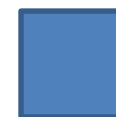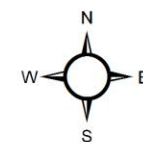

# M15

dried spots  
analyzed

506

primary  
vectors

233

- ✚ EIR positive
- IgG hotspot house
- house

HBR by catch site

- < 46.5
- 46.5 - 158.9
- 159.0 - 467.9
- 468.0 +

IgG intensity

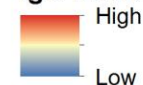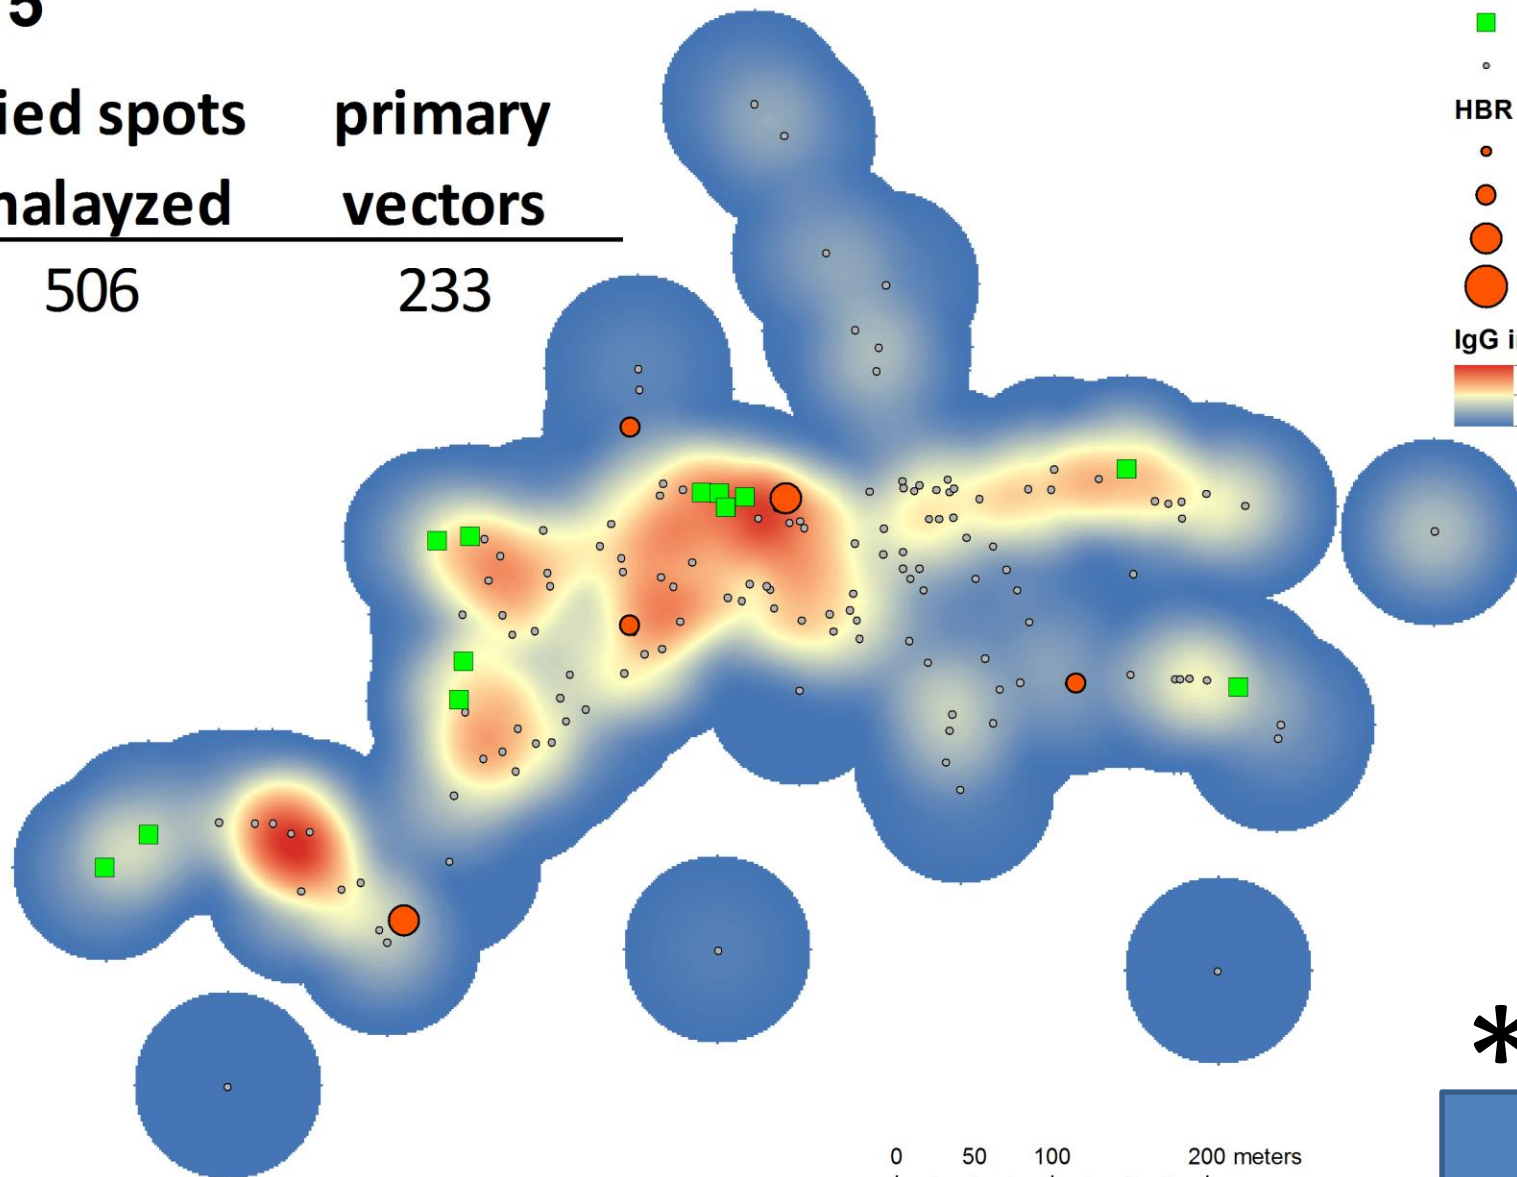

0 50 100 200 meters

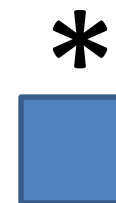

# M18

dried spots  
analyzed

467

primary  
vectors

22

- ✚ EIR positive
- IgG hotspot house
- house

### HBR by catch site

- < 46.5
- 46.5 - 158.9
- 159.0 - 467.9
- 468.0 +

### IgG intensity

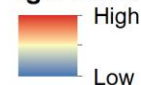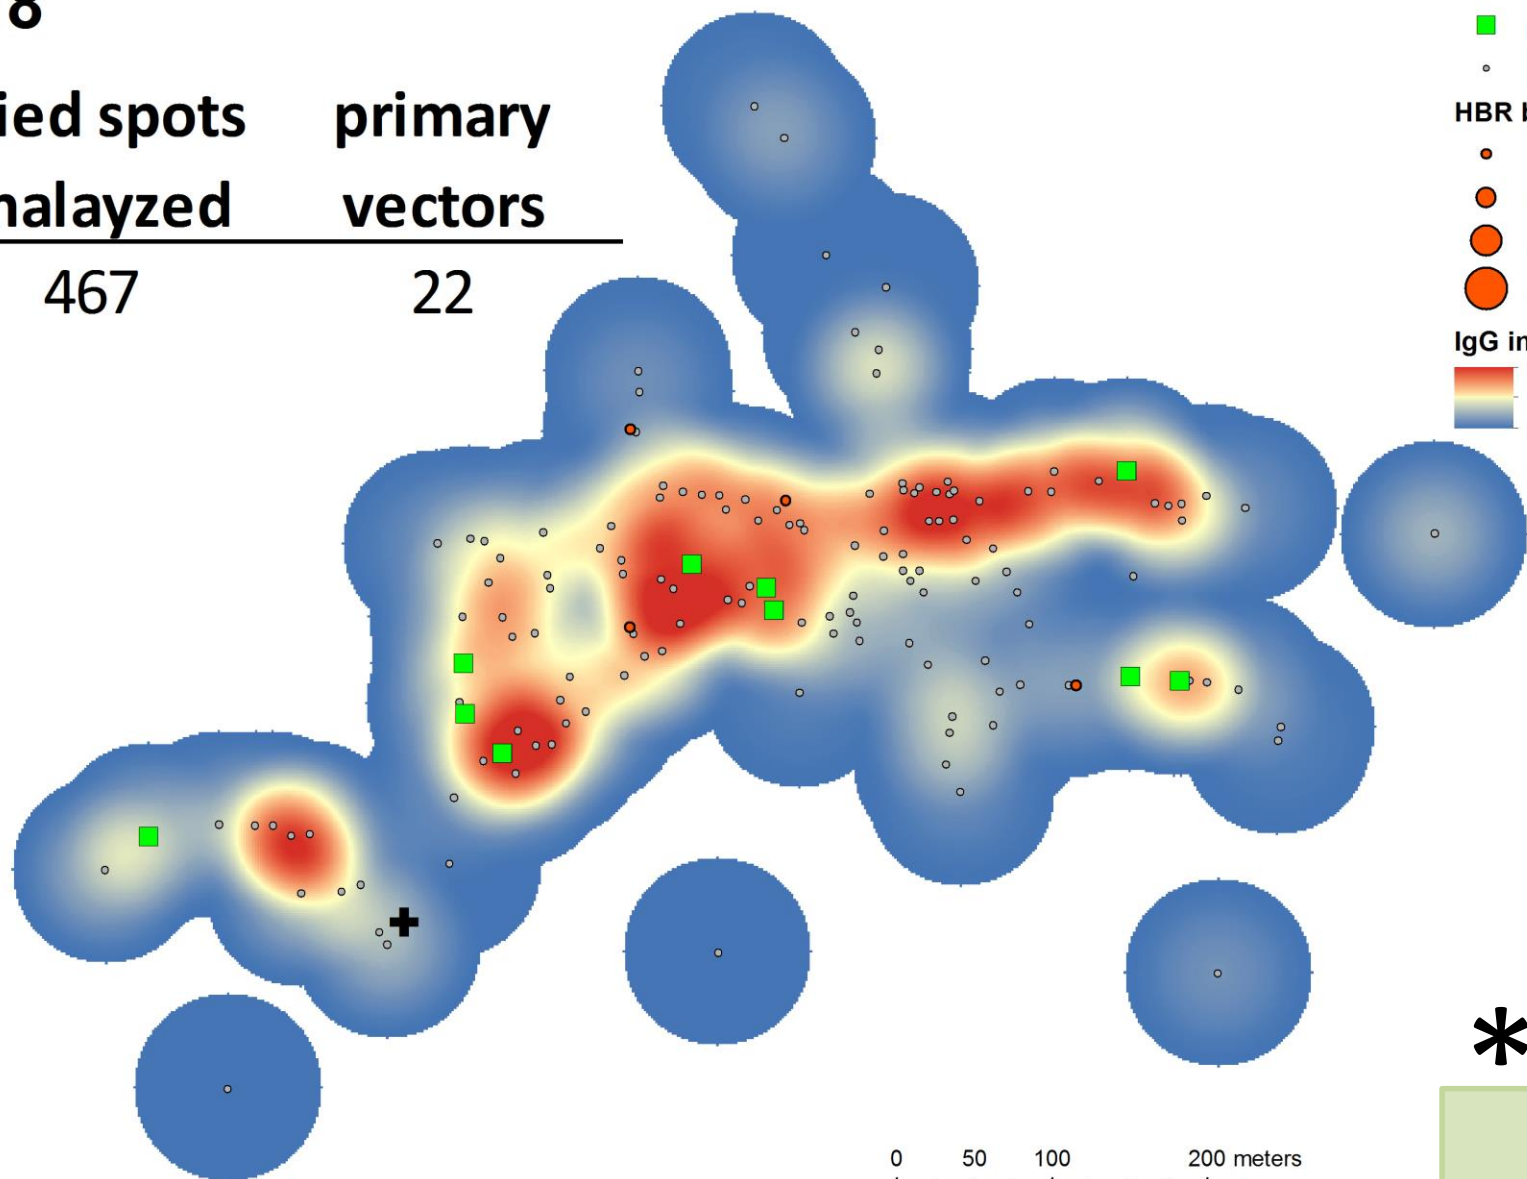

0 50 100 200 meters

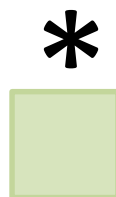

TOT

**M0**

**dried spots  
analyzed**

404

**primary  
vectors**

74

- ✚ EIR positive
- IgG hotspot house
- house

**HBR by catch site**

- < 46.5
- 46.5 - 158.9
- 159.0 - 467.9
- 468 +

**IgG intensity**

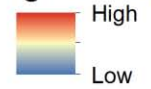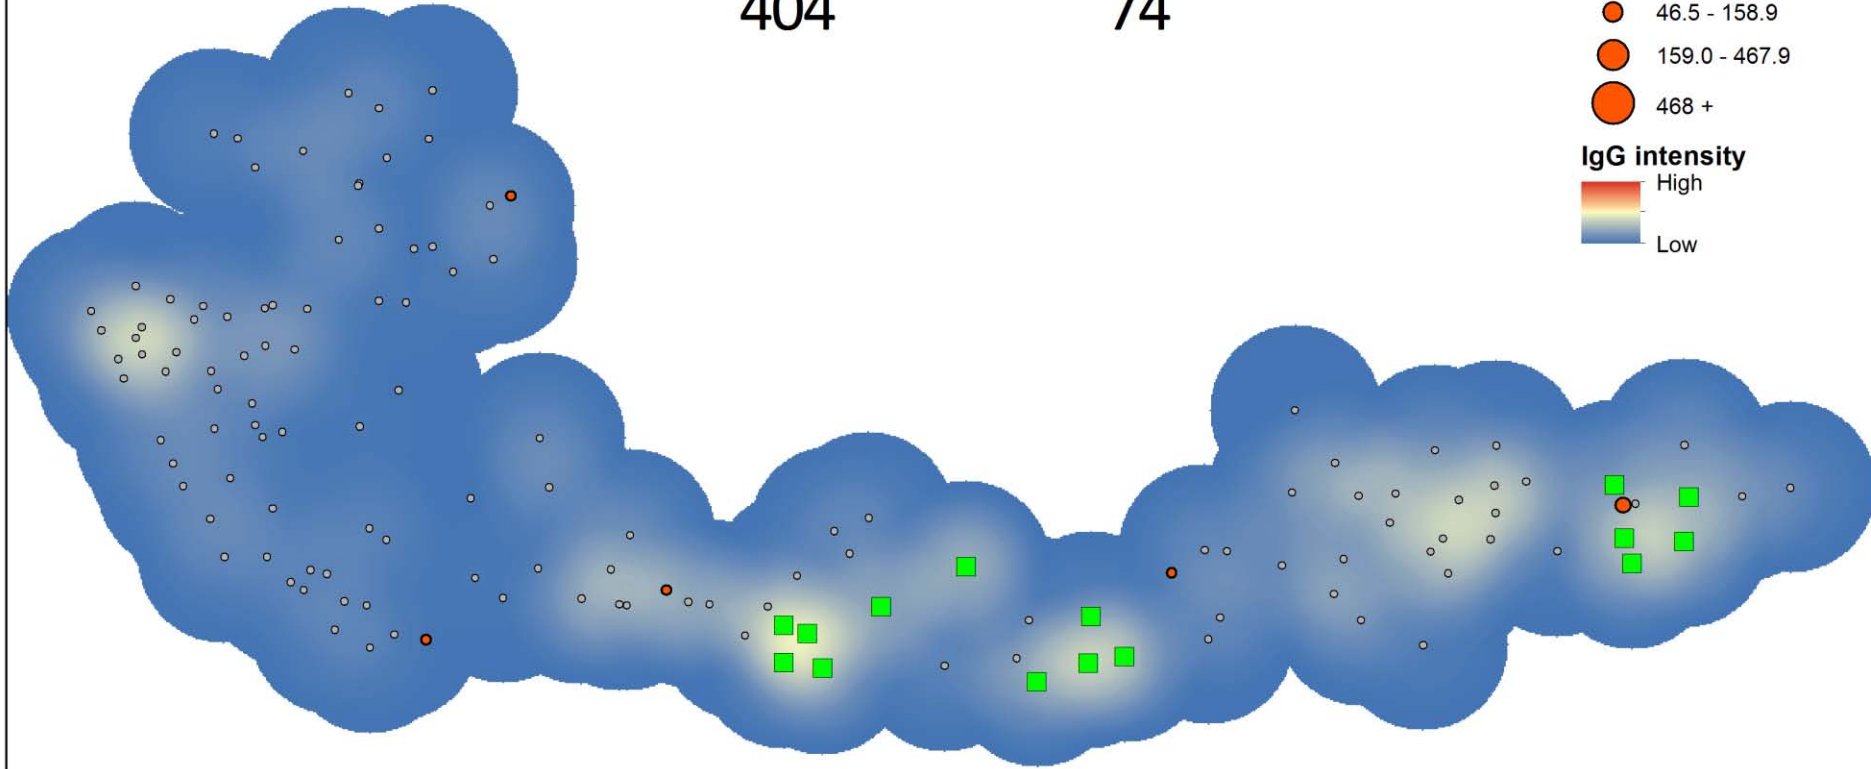

0 50 100 200 meters

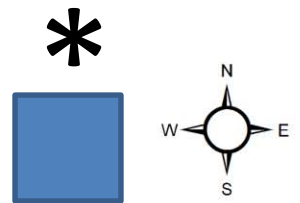

# M3

**dried spots  
analyzed**

322

**primary  
vectors**

704

- ⊕ EIR positive
- IgG hotspot house
- house

**HBR by catch site**

- < 46.5
- 46.5 - 158.9
- 159.0 - 467.9
- 468 +

**IgG intensity**

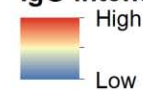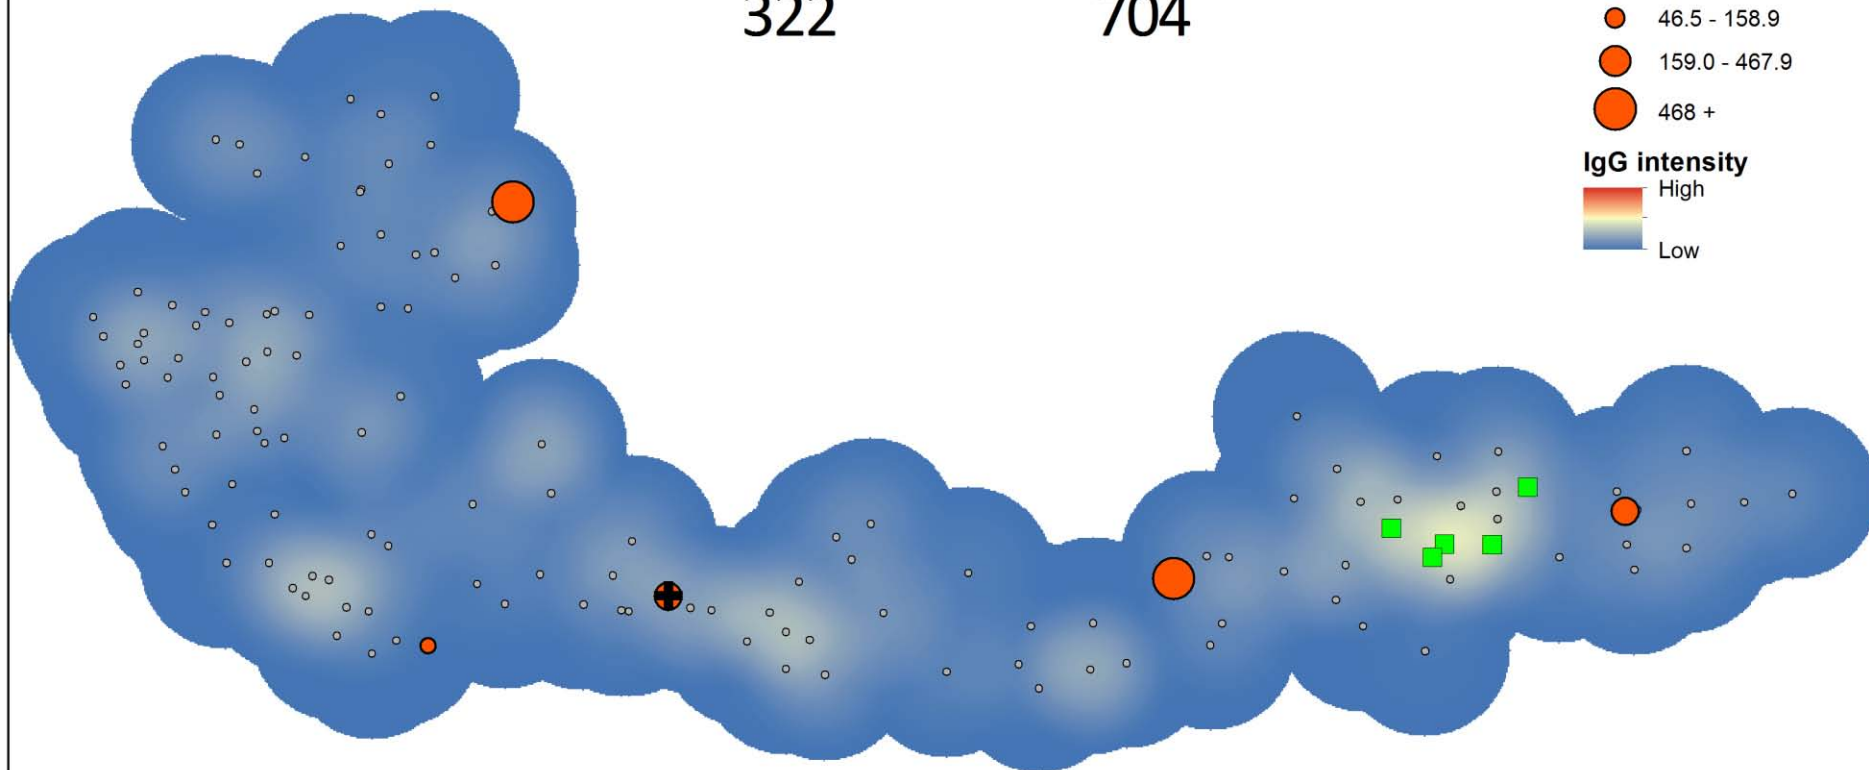

0 50 100 200 meters

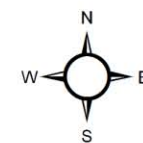

M6

dried spots  
analyzed

201

primary  
vectors

1595

- ✚ EIR positive
- IgG hotspot house
- house

HBR by catch site

- < 46.5
- 46.5 - 158.9
- 159.0 - 467.9
- 468 +

IgG intensity

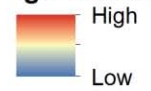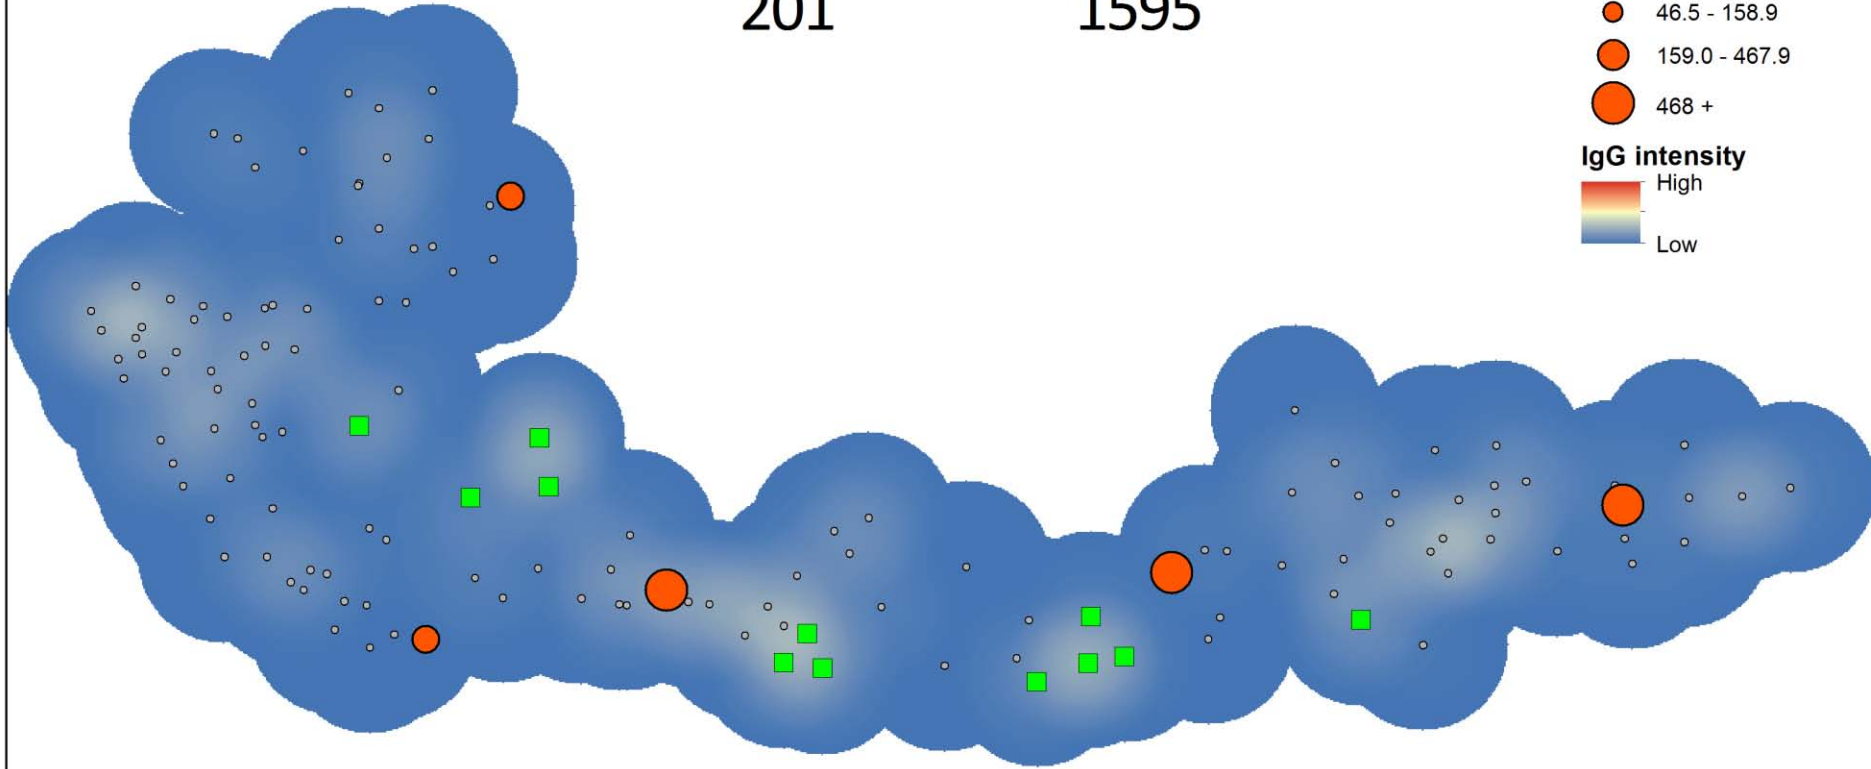

0 50 100 200 meters

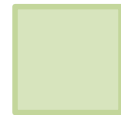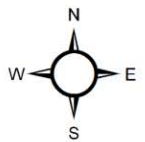

M9

dried spots  
analyzed

292

primary  
vectors

22

- ✚ EIR positive
- IgG hotspot house
- house

HBR by catch site

- < 46.5
- 46.5 - 158.9
- 159.0 - 467.9
- 468 +

IgG intensity

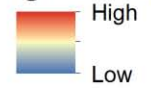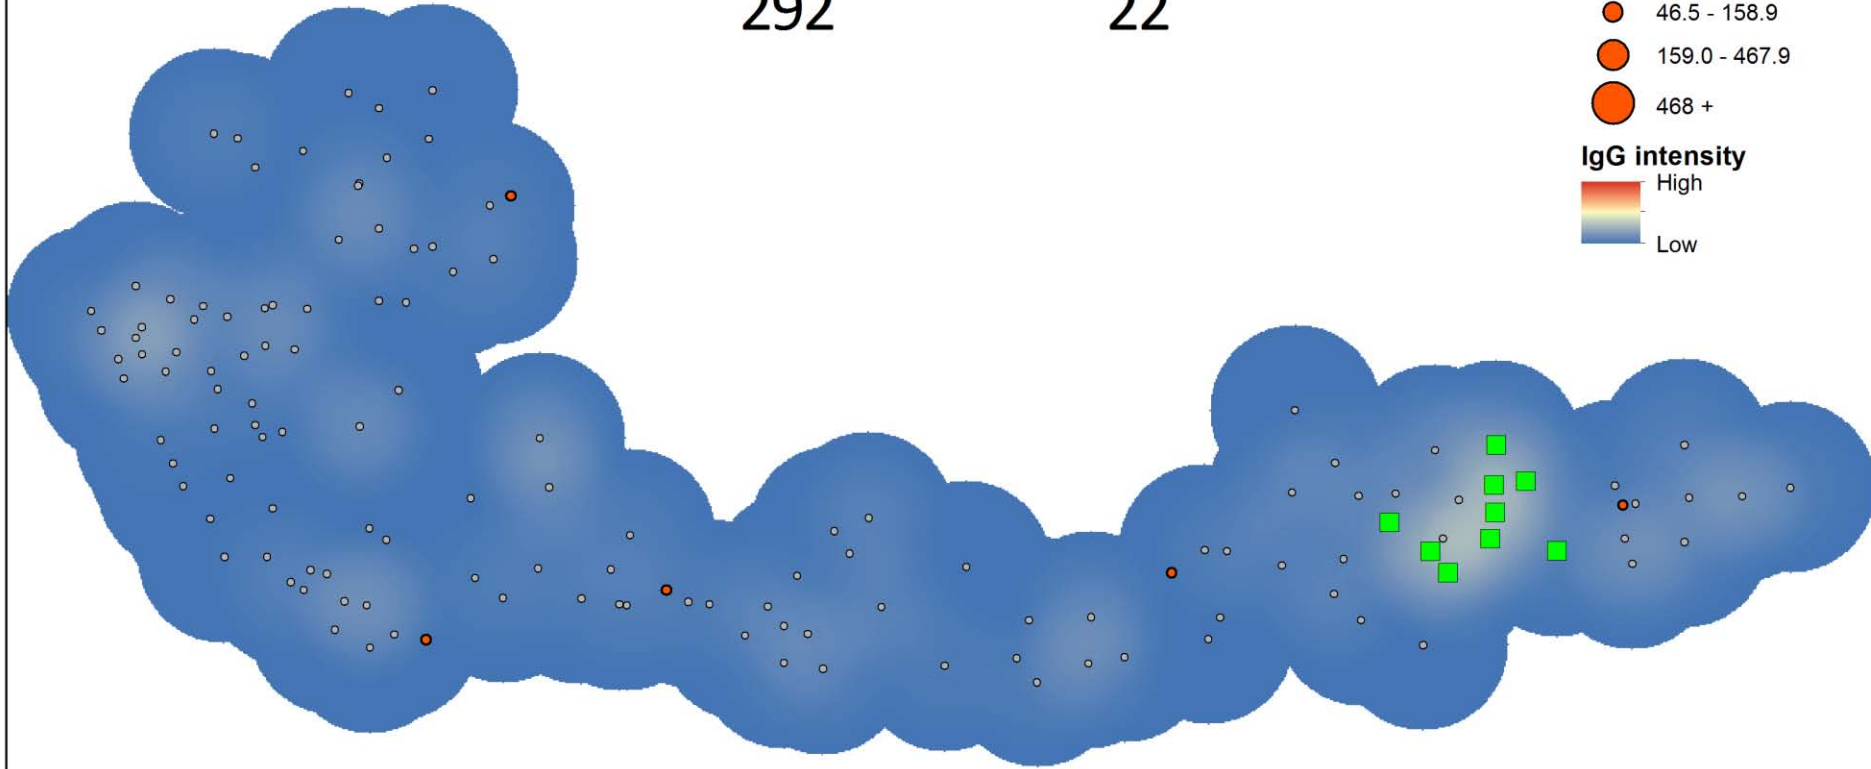

0 50 100 200 meters

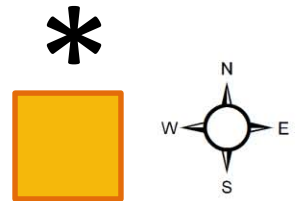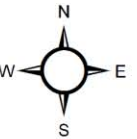



# M12

**dried spots  
analyzed**

249

**primary  
vectors**

94

- ✚ EIR positive
- IgG hotspot house
- house

**HBR by catch site**

- < 46.5
- 46.5 - 158.9
- 159.0 - 467.9
- 468 +

**IgG intensity**

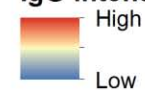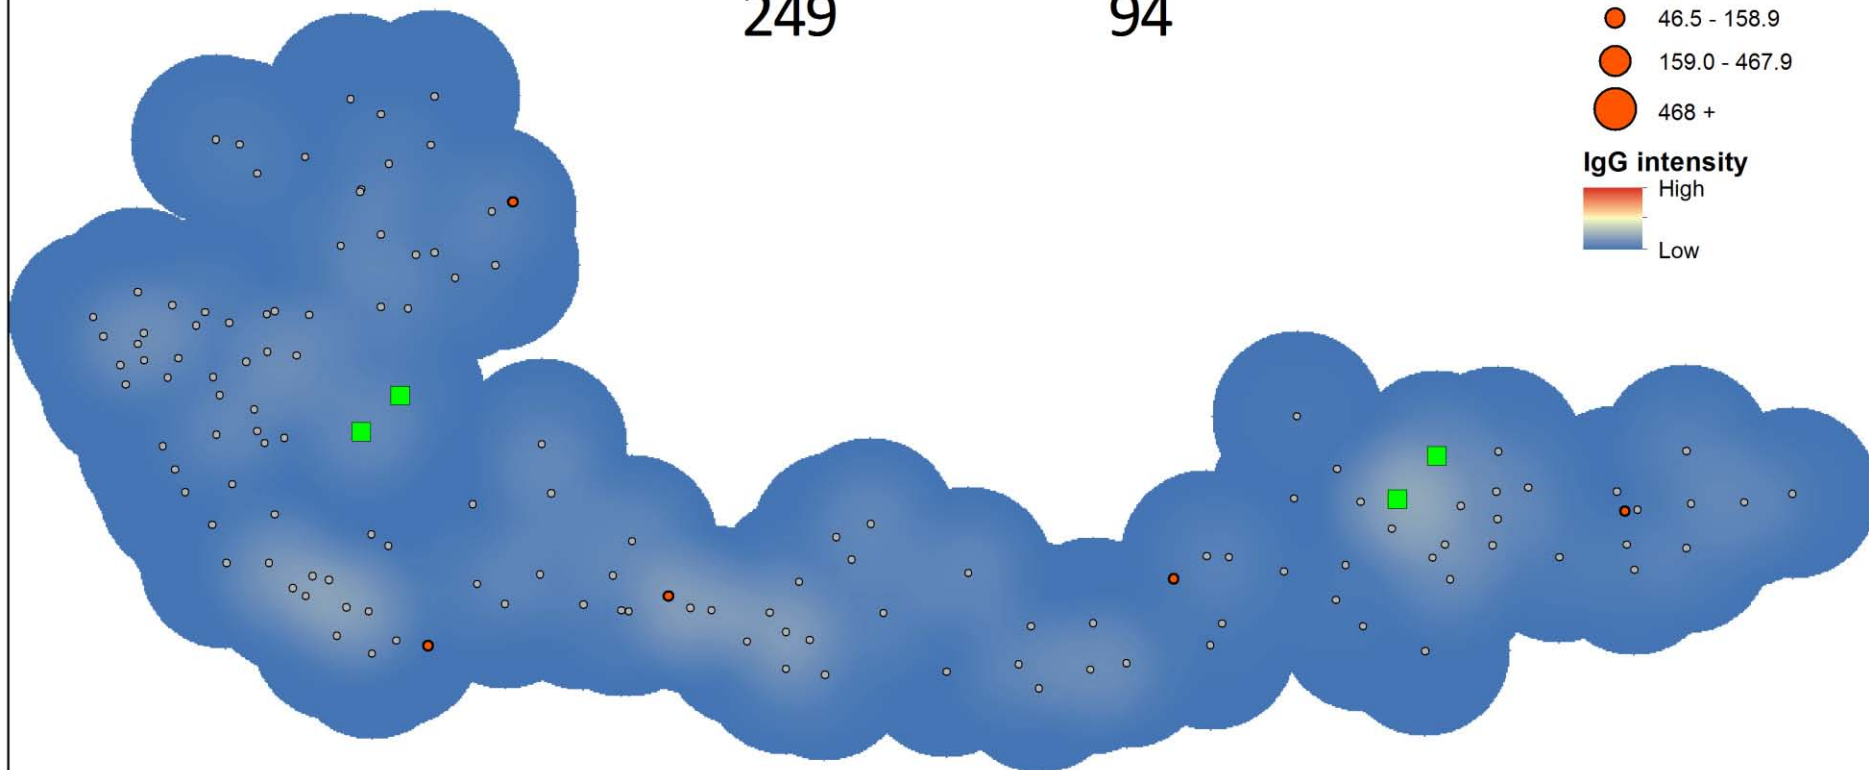

0 50 100 200 meters



# M15

dried spots  
analyzed

307

primary  
vectors

3287

- ⊕ EIR positive
- IgG hotspot house
- house

HBR by catch site

- < 46.5
- 46.5 - 158.9
- 159.0 - 467.9
- 468 +

IgG intensity

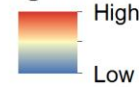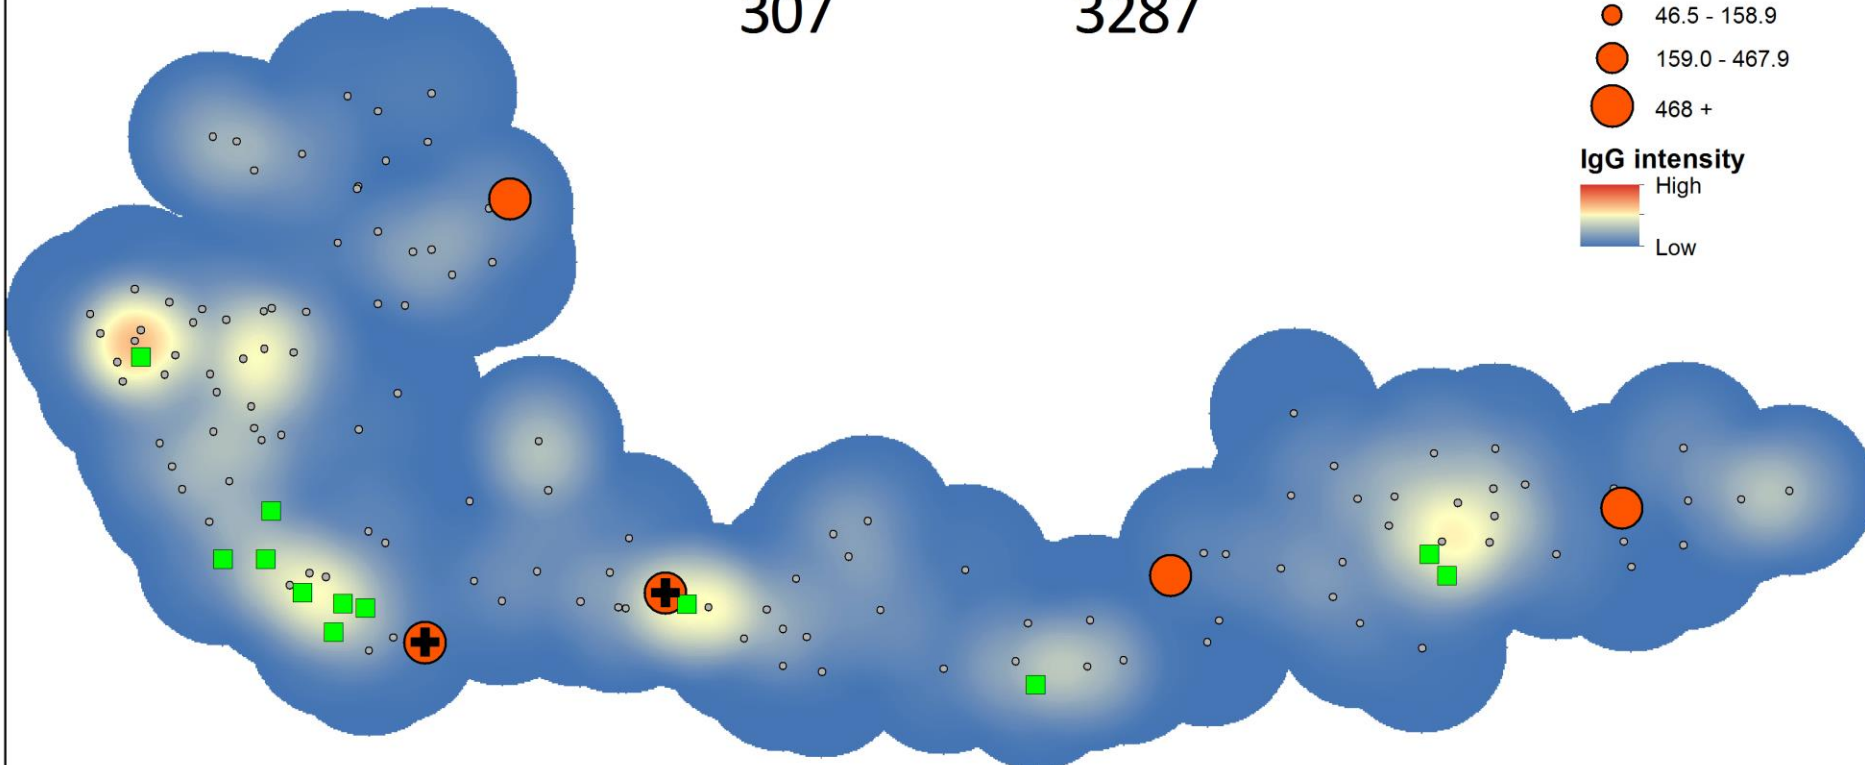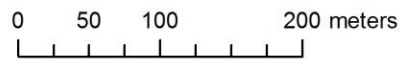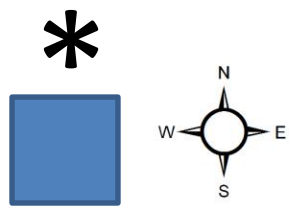

# M18

**dried spots  
analyzed**

195

**primary  
vectors**

4346

- ✚ EIR positive
- IgG hotspot house
- house

**HBR by catch site**

- < 46.5
- 46.5 - 158.9
- 159.0 - 467.9
- 468 +

**IgG intensity**

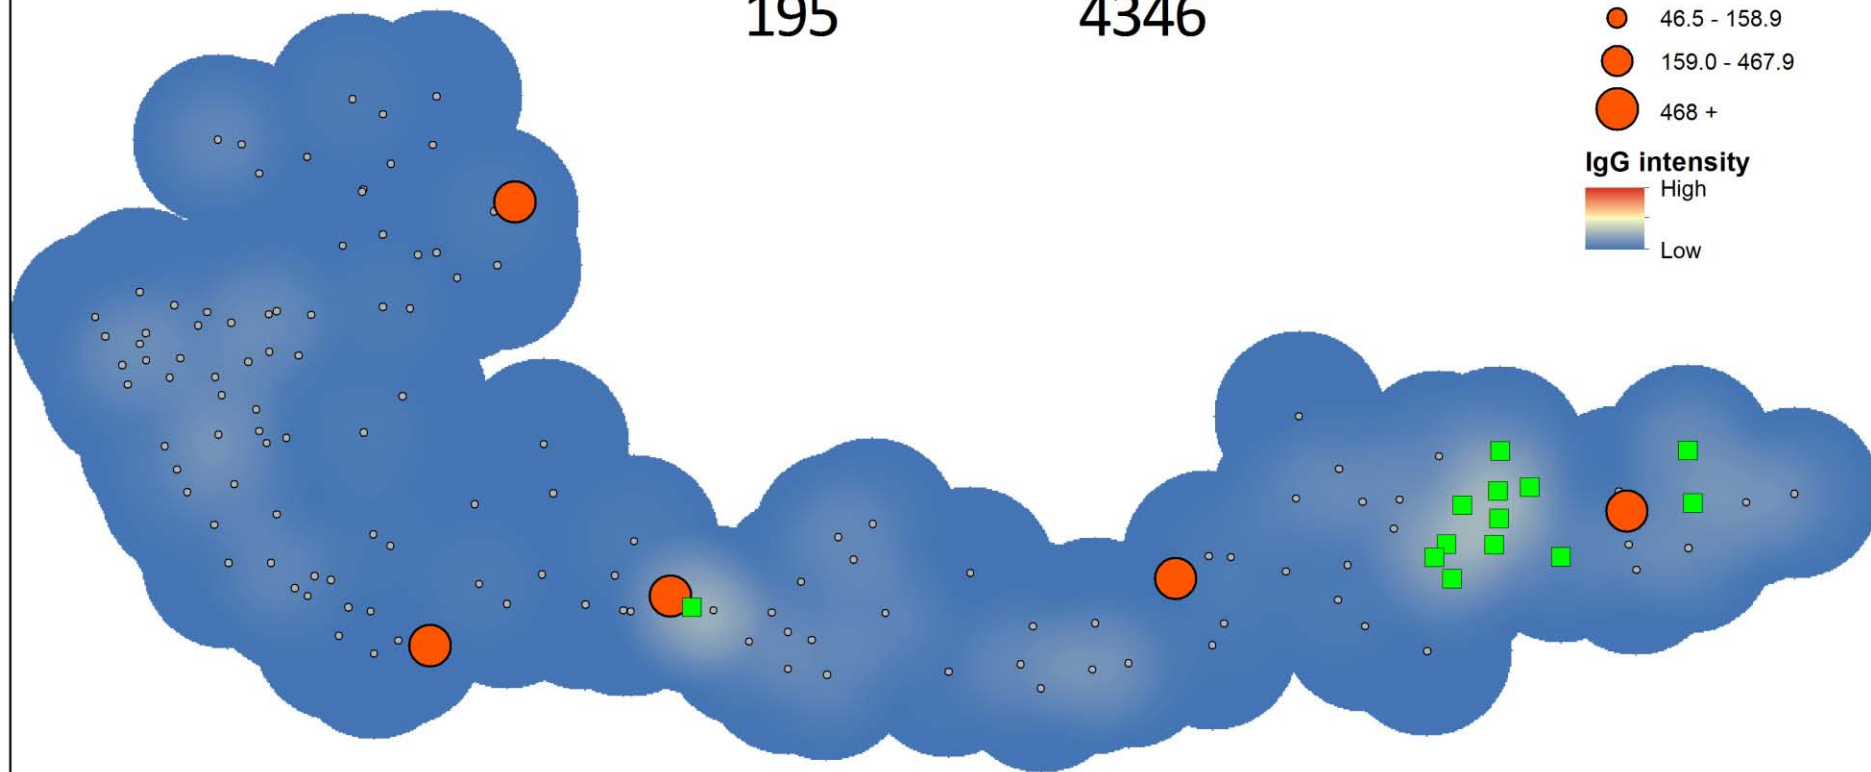

0 50 100 200 meters

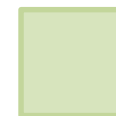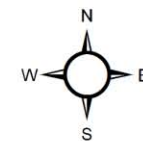

Supplement: jiw543_suppl_supplementary_information_s5_maps_copie.pdf [file jiw543_suppl_supplementary_information_s5_maps_copie.pdf]
