# Supplementary material
Source: PubMed Central journal article supplement (PMC5853934)
Supplement: jiw543_suppl_supplementary_information_s3_modif.doc.pdf [file jiw543_suppl_supplementary_information_s3_modif.doc.pdf]

| Village                    |                  | TPN                          |                          |      |        |                        |                        |                                         |                                  |                                  |                                |                                |                                  |                                |
|----------------------------|------------------|------------------------------|--------------------------|------|--------|------------------------|------------------------|-----------------------------------------|----------------------------------|----------------------------------|--------------------------------|--------------------------------|----------------------------------|--------------------------------|
| Survey of blood collection | Total population | Characteristic of blood spot |                          |      |        |                        |                        | Antibody prevalence % , (n/N) , (95%CI) |                                  |                                  |                                |                                |                                  |                                |
|                            |                  | Blood Collection date        | Number of dry blood spot | Male | Female | Median age (range) (y) |                        | Sex                                     |                                  |                                  | Age                            |                                |                                  |                                |
|                            |                  |                              |                          |      |        |                        |                        | Male                                    | Female                           | Total                            | 0-4                            | 5-15                           | 15-59                            | 60 up                          |
| <b>M0</b>                  | 373              | 20/05/2013                   | 258                      | 146  | 112    | 27.3 (1-66)            | %<br>(95% CI)<br>(n/N) | 45,2<br>(37.0-53.6)<br>(66/146)         | 42,9<br>(33.7-52.6)<br>(48/112)  | 44,2<br>(38.1-50.0)<br>(114/258) | 33,3<br>(6.0-75.9)<br>(2/6)    | 41,0<br>(30.2-52.8)<br>(32/78) | 45,2<br>(37.6-53.1)<br>(76/168)  | 66,7<br>(24.1-94.0)<br>(4/6)   |
| <b>M3</b>                  | 406              | 23/08/2013                   | 283                      | 154  | 129    | 24.8 (1-66)            | %<br>(95% CI)<br>(n/N) | 57,8<br>(49.6-65.6)<br>(89/154)         | 60,5<br>(51.5-68.9)<br>(78/129)  | 59,0<br>(53.0-64.8)<br>(167/283) | 51,7<br>(32.9-70.1)<br>(15/29) | 53,7<br>(42.4-64.6)<br>(44/82) | 63,0<br>(55.1-70.3)<br>(104-165) | 57,1<br>(20.2-88.2)<br>(4/7)   |
| <b>M6</b>                  | 434              | 07/11/2013                   | 300                      | 158  | 142    | 24.8 (0-66)            | %<br>(95% CI)<br>(n/N) | 49,4<br>(41.4-57.4)<br>(78/158)         | 49,3<br>(40.9-57.8)<br>(70/142)  | 49,3<br>(43.6-55.1)<br>(148/300) | 43,6<br>(28.2-60.2)<br>(17/39) | 57,8<br>(46.5-68.4)<br>(48/83) | 45,6<br>(38.0-53.4)<br>(78/171)  | 71,4<br>(30.3-94.9)<br>(5/7)   |
| <b>M9</b>                  | 464              | 28/01/2014                   | 307                      | 160  | 147    | 23.9 (0-66)            | %<br>(95% CI)<br>(n/N) | 50,0<br>(42.0-58.0)<br>(80/160)         | 36,1<br>(28.4-44.4)<br>(53/147)  | 43,3<br>(37.7-49.1)<br>(133/307) | 34,8<br>(21.8-50.3)<br>(16/46) | 47,7<br>(36.9-58.7)<br>(41/86) | 43,4<br>(35.8-51.3)<br>(72/166)  | 44,4<br>(15.3-77.3)<br>(4/9)   |
| <b>M12</b>                 | 473              | 23/04/2014                   | 260                      | 135  | 125    | 22.8 (0-66)            | %<br>(95% CI)<br>(n/N) | 60,7<br>(51.9-68.9)<br>(82/135)         | 68,0<br>(59.0-75.9)<br>(85/125)  | 64,2<br>(58.0-70.0)<br>(167/260) | 65,1<br>(49.0-78.6)<br>(28/43) | 63,4<br>(52.0-73.6)<br>(52/82) | 65,9<br>(57.0-73.9)<br>(85/129)  | 33,3<br>(6.0-75.9)<br>(2/6)    |
| <b>M15</b>                 | 492              | 14/07/2014                   | 233                      | 127  | 106    | 24.3 (0-66)            | %<br>(95% CI)<br>(n/N) | 80,3<br>(72.1-86.6)<br>(102/127)        | 76,4<br>(67.0-83.9)<br>(81/106)  | 78,5<br>(72.6-83.5)<br>(183/233) | 70,6<br>(52.3-84.3)<br>(24/34) | 83,1<br>(71.3-90.9)<br>(54/65) | 77,2<br>(68.7-84.0)<br>(98/127)  | 100,0<br>(56.1-100.0)<br>(7/7) |
| <b>M18</b>                 | 501              | 08-10-14                     | 265                      | 139  | 126    | 23.0 (0-66)            | %<br>(95% CI)<br>(n/N) | 83,5<br>(76.0-89.0)<br>(116/139)        | 81,7<br>(73.7-87.9)<br>(103-126) | 82,6<br>(77.4-86.9)<br>(219/265) | 82,2<br>(67.4-91.5)<br>(37/45) | 78,2<br>(67.2-86.5)<br>(61/78) | 85,3<br>(78.0-90.6)<br>(116/136) | 83,3<br>(36.5-99.1)<br>(5/6)   |

| Village                    |                  | TOT                          |                          |      |        |                        |                                         |                                  |                                  |                                  |                                |                                 |                                  |                                |
|----------------------------|------------------|------------------------------|--------------------------|------|--------|------------------------|-----------------------------------------|----------------------------------|----------------------------------|----------------------------------|--------------------------------|---------------------------------|----------------------------------|--------------------------------|
| Survey of blood collection | Total population | Characteristic of blood spot |                          |      |        |                        | Antibody prevalence % , (n/N) , (95%CI) |                                  |                                  |                                  |                                |                                 |                                  |                                |
|                            |                  | Blood Collection date        | Number of dry blood spot | Male | Female | Median age (range) (y) | Sex                                     |                                  |                                  | Age                              |                                |                                 |                                  |                                |
|                            |                  |                              |                          |      |        |                        | Male                                    | Female                           | Total                            | 0-4                              | 5-15                           | 15-59                           | 60 up                            |                                |
| <b>M0</b>                  | 740              | 14/06/2013                   | 404                      | 192  | 212    | 26.8 (0-80)            | %<br>(95% CI)<br>(n/N)                  | 68,2<br>(61.1-74.7)<br>(131/192) | 62,7<br>(55.8-69.2)<br>(133/212) | 65,3<br>(60.5-69.9)<br>(264/404) | 42,9<br>(18.8-70.4)<br>(6/14)  | 58,1<br>(49.3-66.4)<br>(79/136) | 72,4<br>(66.1-78.0)<br>(168/232) | 50,0<br>(28.8-71.2)<br>(11/22) |
| <b>M3</b>                  | 785              | 12/09/2013                   | 322                      | 149  | 173    | 22.2 (0-70)            | %<br>(95% CI)<br>(n/N)                  | 77,2<br>(69.5-83.5)<br>(115/149) | 71,7<br>(28.7-38.5)<br>(124/173) | 74,2<br>(69.0-78.8)<br>(239/322) | 63,6<br>(47.7-77.2)<br>(28/44) | 70,3<br>(61.1-78.2)<br>(83/118) | 78,8<br>(71.1-84.9)<br>(115/146) | 92,9<br>(64.2-99.6)<br>(13/14) |
| <b>M6</b>                  | 789              | 26/11/2013                   | 201                      | 98   | 103    | 24.1 (1-70)            | %<br>(95% CI)<br>(n/N)                  | 75,5<br>(65.6-83.4)<br>(74/98)   | 81,6<br>(72.4-88.3)<br>(84/103)  | 78,6<br>(72.2-83.9)<br>(158/201) | 72,0<br>(50.4-87.1)<br>(18/25) | 73,2<br>(61.2-82.7)<br>(52/71)  | 82,6<br>(73.0-89.4)<br>(76/92)   | 92,3<br>(62.1-99.6)<br>(12/13) |
| <b>M9</b>                  | 814              | 18/02/2014                   | 292                      | 144  | 148    | 21.7 (0-80)            | %<br>(95% CI)<br>(n/N)                  | 46,5<br>(38.3-55.0)<br>(67/144)  | 47,3<br>(39.1-55.6)<br>(70/148)  | 46,9<br>(41.1-52.8)<br>(137/292) | 40,0<br>(27.3-54.8)<br>(22/55) | 51,1<br>(40.3-61.9)<br>(45/88)  | 45,7<br>(37.2-54.3)<br>(63/138)  | 63,6<br>(31.6-87.6)<br>(7/11)  |
| <b>M12</b>                 | 833              | 15/05/2014                   | 249                      | 114  | 135    | 19.3 (0-70)            | %<br>(95% CI)<br>(n/N)                  | 59,6<br>(50.0-68.6)<br>(68/114)  | 56,3<br>(47.5-64.7)<br>(76/135)  | 57,8<br>(51.4-64.0)<br>(144/249) | 39,7<br>(27.8-52.8)<br>(25/63) | 59,1<br>(46.3-70.8)<br>(39/66)  | 66,7<br>(57.0-75.2)<br>(74/111)  | 66,7<br>(30.9-91.0)<br>(6/9)   |
| <b>M15</b>                 | 861              | 06/08/2014                   | 307                      | 152  | 155    | 21.3 (0-80)            | %<br>(95% CI)<br>(n/N)                  | 92,1<br>(86.3-95.7)<br>(140/152) | 93,5<br>(88.1-96.7)<br>(145/155) | 92,8<br>(89.2-95.4)<br>(285/307) | 94,7<br>(84.5-98.6)<br>(54/57) | 92,0<br>(84.4-96.2)<br>(92/100) | 92,5<br>(86.4-96.2)<br>(124/134) | 93,8<br>(67.7-99.7)<br>(15/16) |
| <b>M18</b>                 | 879              | 30-10-14                     | 195                      | 93   | 102    | 19.5 (0-70)            | %<br>(95% CI)<br>(n/N)                  | 57,0<br>(46.3-67.1)<br>(53/93)   | 74,5<br>(64.8-82.4)<br>(76/102)  | 66,2<br>(59.0-72.7)<br>(129/195) | 47,8<br>(33.1-62.9)<br>(22/46) | 76,8<br>(63.3-86.6)<br>(43/56)  | 72,1<br>(61.2-81.0)<br>(62/86)   | 28,6<br>(5.1-69.7)<br>(2/7)    |

| Village                    |                  | KNH                          |                          |      |        |                        |                                         |                                  |                                  |                                  |                                |                                |                                  |                                  |
|----------------------------|------------------|------------------------------|--------------------------|------|--------|------------------------|-----------------------------------------|----------------------------------|----------------------------------|----------------------------------|--------------------------------|--------------------------------|----------------------------------|----------------------------------|
| Survey of blood collection | Total population | Characteristic of blood spot |                          |      |        |                        | Antibody prevalence % , (n/N) , (95%CI) |                                  |                                  |                                  |                                |                                |                                  |                                  |
|                            |                  | Blood Collection date        | Number of dry blood spot | Male | Female | Median age (range) (y) | Sex                                     |                                  |                                  | Age                              |                                |                                |                                  |                                  |
|                            |                  |                              |                          |      |        |                        | Male                                    | Female                           | Total                            | 0-4                              | 5-15                           | 15-59                          | 60 up                            |                                  |
| <b>M0</b>                  | 348              | 14/06/2013                   | 325                      | 180  | 145    | 29.1 (2-73)            | %<br>(95% CI)<br>(n/N)                  | 55,6<br>(48.0-62.9)<br>(100/180) | 51,7<br>(43.3-60.0)<br>(75/145)  | 53,8<br>(48.3-59.3)<br>(175/325) | 33,3<br>(9.0-69.1)<br>(3/9)    | 40,2<br>(30.0-51.3)<br>(35/87) | 59,3<br>(52.4-65.8)<br>(128/216) | 69,2<br>(38.9-89.7)<br>(9/13)    |
| <b>M3</b>                  | 417              | 12/09/2013                   | 277                      | 147  | 130    | 28.1 (1-73)            | %<br>(95% CI)<br>(n/N)                  | 47,6<br>(39.4-56.0)<br>(70/147)  | 51,5<br>(42.7-60.3)<br>(67/130)  | 49,5<br>(43.4-55.5)<br>(137/277) | 30,4<br>(14.1-53.0)<br>(7/23)  | 38,4<br>(27.4-50.5)<br>(28/73) | 56,7<br>(49.0-64.2)<br>(97/171)  | 50,0<br>(20.1-79.9)<br>(5/10)    |
| <b>M6</b>                  | 435              | 11/12/2013                   | 263                      | 141  | 122    | 28.1 (0-73)            | %<br>(95% CI)<br>(n/N)                  | 61,7<br>(53.1-69.7)<br>(87/141)  | 52,5<br>(43.3-61.5)<br>(64/122)  | 57,4<br>(51.2-63.4)<br>(151/263) | 59,1<br>(36.7-78.5)<br>(13/22) | 55,7<br>(43.4-67.4)<br>(39/70) | 56,5<br>(48.5-64.2)<br>(91/161)  | 80,0<br>(44.2-96.5)<br>(8/10)    |
| <b>M9</b>                  | 449              | 05/03/2014                   | 301                      | 155  | 146    | 25.9 (0-73)            | %<br>(95% CI)<br>(n/N)                  | 47,7<br>(39.7-55.9)<br>(74/155)  | 49,3<br>(41.0-57.7)<br>(72/146)  | 48,5<br>(42.8-54.3)<br>(146/301) | 43,2<br>(27.5-60.4)<br>(16/37) | 45,2<br>(34.5-56.4)<br>(38/84) | 52,1<br>(44.3-59.8)<br>(88/169)  | 36,4<br>(12.4-68.4)<br>(4/11)    |
| <b>M12</b>                 | 469              | 26/05/2014                   | 298                      | 160  | 138    | 25.1 (0-73)            | %<br>(95% CI)<br>(n/N)                  | 41,9<br>(34.2-49.9)<br>(67/160)  | 39,1<br>(31.1-47.8)<br>(54/138)  | 40,6<br>(35.0-46.4)<br>(121/298) | 31,7<br>(18.6-48.2)<br>(13/41) | 47,6<br>(36.7-58.7)<br>(40/84) | 38,4<br>(31.0-46.4)<br>(63/164)  | 55,6<br>(22.7-84.7)<br>(5/9)     |
| <b>M15</b>                 | 485              | 21/08/2014                   | 300                      | 162  | 138    | 26.0 (0-70)            | %<br>(95% CI)<br>(n/N)                  | 94,4<br>(89.4-97.3)<br>(153/162) | 96,4<br>(91.3-98.7)<br>(133/138) | 95,3<br>(92.1-97.3)<br>(286/300) | 81,0<br>(65.4-90.9)<br>(34/42) | 97,1<br>(89.1-99.5)<br>(68/70) | 97,8<br>(94.0-99.3)<br>(174/178) | 100,0<br>(65.6-100.0)<br>(10/10) |
| <b>M18</b>                 | 495              | 13-11-14                     | 282                      | 154  | 128    | 24.6 (0-70)            | %<br>(95% CI)<br>(n/N)                  | 86,4<br>(79.7-91.2)<br>(133/154) | 83,6<br>(75.8-89.3)<br>(107/128) | 85,1<br>(80.3-89.0)<br>(240/282) | 63,3<br>(48.3-76.2)<br>(31/49) | 84,6<br>(73.1-92.0)<br>(55/65) | 91,2<br>(85.4-94.9)<br>(145/159) | 100,0<br>(62.9-100.0)<br>(9/9)   |

| Village                    |                  | HKT                          |                          |      |        |                        |                                         |                                  |                                  |                                  |                                |                                  |                                  |                                |
|----------------------------|------------------|------------------------------|--------------------------|------|--------|------------------------|-----------------------------------------|----------------------------------|----------------------------------|----------------------------------|--------------------------------|----------------------------------|----------------------------------|--------------------------------|
| Survey of blood collection | Total population | Characteristic of blood spot |                          |      |        |                        | Antibody prevalence % , (n/N) , (95%CI) |                                  |                                  |                                  |                                |                                  |                                  |                                |
|                            |                  | Blood Collection date        | Number of dry blood spot | Male | Female | Median age (range) (y) | Sex                                     |                                  |                                  | Age                              |                                |                                  |                                  |                                |
|                            |                  |                              |                          |      |        |                        | Male                                    | Female                           | Total                            | 0-4                              | 5-15                           | 15-59                            | 60 up                            |                                |
| <b>M0</b>                  | 899              | 04/07/2013                   | 490                      | 241  | 249    | 26.4 (0-94)            | %<br>(95% CI)<br>(n/N)                  | 92,9<br>(88.8-95.7)<br>(224/241) | 94,8<br>(91.0-97.1)<br>(236/249) | 93,9<br>(91.3-95.8)<br>(460/490) | 91,7<br>(71.5-98.6)<br>(22/24) | 92,2<br>(86.8-95.6)<br>(154/167) | 95,0<br>(91.6-97.2)<br>(267/281) | 94,4<br>(70.6-99.7)<br>(17/18) |
| <b>M3</b>                  | 979              | 07/10/2013                   | 535                      | 269  | 266    | 24.5 (0-89)            | %<br>(95% CI)<br>(n/N)                  | 88,5<br>(80.6-89.4)<br>(230/269) | 86,8<br>(82.0-90.5)<br>(231/266) | 86,2<br>(83.9-89.0)<br>(461/535) | 81,6<br>(67.5-90.8)<br>(40/49) | 85,7<br>(79.6-90.3)<br>(156/182) | 86,8<br>(82.2-90.4)<br>(249/287) | 94,1<br>(69.2-99.7)<br>(16/17) |
| <b>M6</b>                  | 1029             | 08/01/2014                   | 500                      | 243  | 257    | 22.1 (0-78)            | %<br>(95% CI)<br>(n/N)                  | 78,2<br>(72.4-83.1)<br>(190/243) | 85,6<br>(80.6-89.5)<br>(220/257) | 82,0<br>(78.3-85.2)<br>(410/500) | 75,8<br>(63.4-85.1)<br>(50/66) | 81,9<br>(75.6-86.9)<br>(158/193) | 84,8<br>(79.3-89.0)<br>(195/230) | 63,6<br>(31.6-87.6)<br>(7/11)  |
| <b>M9</b>                  | 1070             | 01/05/2014                   | 478                      | 240  | 238    | 22.4 (0-78)            | %<br>(95% CI)<br>(n/N)                  | 87,9<br>(83.0-91.6)<br>(211/240) | 86,6<br>(81.4-90.5)<br>(206/238) | 87,2<br>(83.8-90.0)<br>(417/478) | 77,9<br>(65.9-86.7)<br>(53/68) | 86,9<br>(80.6-91.4)<br>(146/168) | 89,7<br>(84.9-93.2)<br>(209/233) | 100,0<br>(62.9-100.0)<br>(9/9) |
| <b>M12</b>                 | 1192             | 24/06/2014                   | 527                      | 269  | 258    | 21.7 (0-89)            | %<br>(95% CI)<br>(n/N)                  | 85,1<br>(80.2-89.0)<br>(229/269) | 89,1<br>(84.6-92.6)<br>(230/258) | 87,1<br>(83.9-89.8)<br>(459/527) | 87,6<br>(78.6-93.4)<br>(78/89) | 88,8<br>(83.1-92.8)<br>(166/187) | 85,7<br>(80.5-89.8)<br>(204/238) | 84,6<br>(53.7-97.3)<br>(11/13) |
| <b>M15</b>                 | 1217             | 16-09-14                     | 506                      | 266  | 240    | 21.6 (0-78)            | %<br>(95% CI)<br>(n/N)                  | 81,2<br>(75.9-85.6)<br>(216/266) | 85,0<br>(79.7-89.1)<br>(204/240) | 83,0<br>(79.4-86.1)<br>(420/506) | 82,1<br>(71.9-89.3)<br>(69/84) | 85,8<br>(79.6-90.4)<br>(151/176) | 81,3<br>(75.6-85.9)<br>(191/235) | 81,8<br>(47.8-96.8)<br>(9/11)  |
| <b>M18</b>                 | 1236             | 08-12-14                     | 467                      | 233  | 234    | 20.0 (0-78)            | %<br>(95% CI)<br>(n/N)                  | 82,8<br>(77.2-87.3)<br>(193/233) | 87,2<br>(82.1-91.1)<br>(204/234) | 85,0<br>(81.4-88.1)<br>(397/467) | 84,0<br>(73.3-91.1)<br>(63/75) | 85,4<br>(79.6-89.8)<br>(170/199) | 84,9<br>(78.6-89.7)<br>(152/179) | 85,7<br>(56.2-97.5)<br>(12/14) |
