# Supplementary material
Source: PubMed Central journal article supplement (PMC5853934)

**Supplementary information S4: Dose-response relationship between the IgG antibody response against gSG6-P1 antigen and the abundance of Anopheles mosquitoes.** The X-axis provides adjusted difference (with standard errors) estimated by the multivariate mixed model by taking the “low HBR” as reference class (data not shown). The mean Human biting rates of primary vectors (black) and total anopheles (grey) are categorized as medium, high and very high according to the quartile. HBR classes for total anopheles were <96 for low HBR (reference); [96 - 204[ for medium HBR; [204 - 531[ for high HBR and;  $\geq 531$  for very high HBR. HBR classes for primary malaria vectors were <46.5 for low HBR (reference); [46.5 - 159[ for medium HBR; [159 - 468[ (high HBR) and;  $\geq 468$  very high HBR.

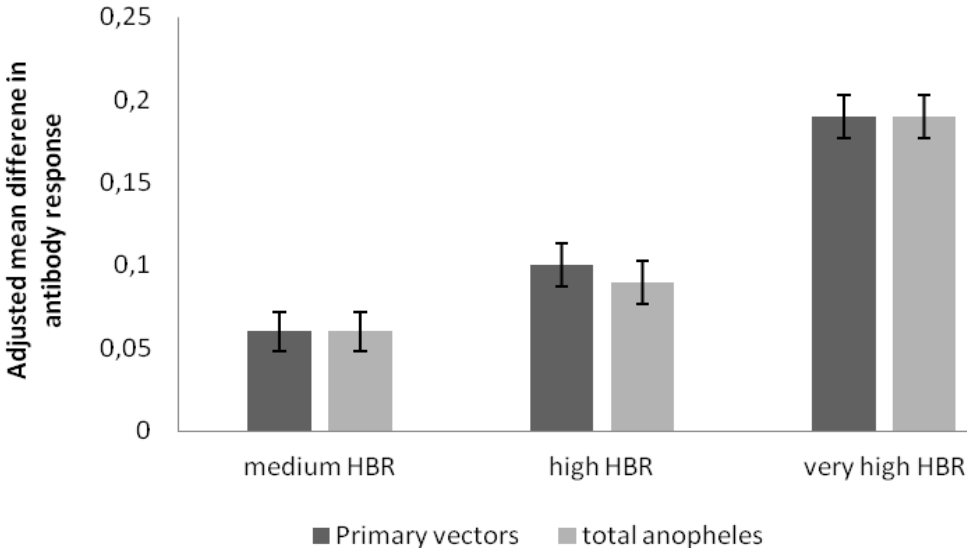

Supplement: jiw543_suppl_supplementary_information_s4_modif.pdf [file jiw543_suppl_supplementary_information_s4_modif.pdf]
